# Supplementary material for: Selection and the direction of phenotypic evolution
Source: eLife journal article supplement (doi:10.7554/elife.80993), 2023-08-31
Supplement: fig1-data2 [file elife-80993-fig1-data2-v2.pdf]

Number of phenotyped RILs per population in each environment

|              | <b>High Salt</b> | <b>Low Salt</b> |
|--------------|------------------|-----------------|
| <b>A6140</b> | 186              | 187             |
| <b>GA150</b> | 61               | 61              |
| <b>GA250</b> | 61               | 61              |
| <b>GA450</b> | 42               | 42              |

**Raw output from R is available at:**

[https://github.com/ExpEvolWormLab/Mallard\\_Robertson/tree/main/output\\_files/txt/output\\_files/txt/sample\\_sizes\\_uniq\\_lines.txt](https://github.com/ExpEvolWormLab/Mallard_Robertson/tree/main/output_files/txt/output_files/txt/sample_sizes_uniq_lines.txt)
