# Supplementary material for: Selection and the direction of phenotypic evolution
Source: eLife journal article supplement (doi:10.7554/elife.80993), 2023-08-31
Supplement: fig1-data3 [file elife-80993-fig1-data3-v2.pdf]

| Factor                               | Df  | Wilks   | approx. F | numerator<br>Df | denominator<br>Df | Pr(>F)    |
|--------------------------------------|-----|---------|-----------|-----------------|-------------------|-----------|
| salt environment                     | 1   | 0.13728 | 523.41    | 7               | 583.0             | < 2.2e-16 |
| population                           | 3   | 0.30973 | 40.20     | 21              | 1674.6            | < 2.2e-16 |
| temperature                          | 1   | 0.52131 | 76.48     | 7               | 583.0             | < 2.2e-16 |
| humidity                             | 1   | 0.98677 | 1.12      | 7               | 583.0             | 0.3508    |
| log density                          | 1   | 0.26888 | 226.47    | 7               | 583.0             | < 2.2e-16 |
| Assay year                           | 1   | 0.58612 | 58.81     | 7               | 583.0             | < 2.2e-16 |
| block effect                         | 96  | 0.17860 | 1.70      | 672             | 4085.4            | < 2.2e-16 |
| salt environment x population        | 3   | 0.82841 | 5.40      | 21              | 1674.6            | 3.99e-14  |
| temperature x humidity               | 1   | 0.98433 | 1.33      | 7               | 583.0             | 0.2352    |
| temperature x log density            | 1   | 0.93379 | 5.91      | 7               | 583.0             | 1.20e-06  |
| humidity x log density               | 1   | 0.99185 | 0.68      | 7               | 583.0             | 0.6856    |
| temperature x humidity x log density | 1   | 0.98383 | 1.37      | 7               | 583.0             | 0.2160    |
| Residuals                            | 589 |         |           |                 |                   |           |

Raw output from R is available at: [https://github.com/ExpEvolWormLab/Mallard\\_Robertson/tree/main/output\\_files/txt/output\\_files/txt/Manova\\_results.txt](https://github.com/ExpEvolWormLab/Mallard_Robertson/tree/main/output_files/txt/output_files/txt/Manova_results.txt)
