# Supplementary material for: Selection and the direction of phenotypic evolution
Source: eLife journal article supplement (doi:10.7554/elife.80993), 2023-08-31
Supplement: fig1-data4 [file elife-80993-fig1-data4-v2.pdf]

|            | Df                                   | Sum Sq | Mean Sq | F value | Pr (>F)  | Sign.     |     |
|------------|--------------------------------------|--------|---------|---------|----------|-----------|-----|
| Trait : SF | salt environment                     | 1      | 17.716  | 17.716  | 75.8635  | < 2.2e-16 | *** |
|            | population                           | 3      | 28.261  | 9.420   | 40.3404  | < 2.2e-16 | *** |
|            | temperature                          | 1      | 49.034  | 49.034  | 209.9752 | < 2.2e-16 | *** |
|            | humidity                             | 1      | 0.078   | 0.078   | 0.3343   | 0.5633749 | .   |
|            | log density                          | 1      | 72.404  | 72.404  | 310.0496 | < 2.2e-16 | *** |
|            | Assay year                           | 1      | 10.868  | 10.868  | 46.5368  | 2.236e-11 | *** |
|            | block effect                         | 96     | 41.571  | 0.433   | 1.8543   | 8.663e-06 | *** |
|            | salt environment x population        | 3      | 4.539   | 1.513   | 6.4796   | 0.0002556 | *** |
|            | temperature x humidity               | 1      | 0.197   | 0.197   | 0.8427   | 0.3590055 | .   |
|            | temperature x log density            | 1      | 0.000   | 0.000   | 0.0002   | 0.9892668 | .   |
|            | humidity x log density               | 1      | 0.028   | 0.028   | 0.1183   | 0.7309616 | .   |
|            | temperature x humidity x log density | 1      | 0.021   | 0.021   | 0.0897   | 0.7646773 | .   |
|            | Residuals                            | 589    | 137.546 | 0.234   |          |           |     |

|            | Df                                   | Sum Sq | Mean Sq | F value | Pr (>F)  | Sign.     |     |
|------------|--------------------------------------|--------|---------|---------|----------|-----------|-----|
| Trait : SF | salt environment                     | 1      | 1.200   | 1.200   | 2.4854   | 0.11544   | .   |
|            | population                           | 3      | 135.427 | 45.142  | 93.5105  | < 2.2e-16 | *** |
|            | temperature                          | 1      | 1.436   | 1.436   | 2.9744   | 0.08512   | .   |
|            | humidity                             | 1      | 2.136   | 2.136   | 4.4240   | 0.03586   | *   |
|            | log density                          | 1      | 187.535 | 187.535 | 388.4689 | < 2.2e-16 | *** |
|            | Assay year                           | 1      | 0.128   | 0.128   | 0.2647   | 0.60710   | .   |
|            | block effect                         | 96     | 103.359 | 1.077   | 2.2302   | 6.572e-09 | *** |
|            | salt environment x population        | 3      | 0.757   | 0.252   | 0.5230   | 0.66665   | .   |
|            | temperature x humidity               | 1      | 0.688   | 0.688   | 1.4252   | 0.23304   | .   |
|            | temperature x log density            | 1      | 3.092   | 3.092   | 6.4052   | 0.01164   | *   |
|            | humidity x log density               | 1      | 0.141   | 0.141   | 0.2913   | 0.58959   | .   |
|            | temperature x humidity x log density | 1      | 2.640   | 2.640   | 5.4693   | 0.01969   | *   |
|            | Residuals                            | 589    | 284.342 | 0.483   |          |           |     |

|            | Df                                   | Sum Sq | Mean Sq | F value | Pr (>F)  | Sign.     |     |
|------------|--------------------------------------|--------|---------|---------|----------|-----------|-----|
| Trait : SB | salt environment                     | 1      | 8.519   | 8.519   | 29.1247  | 9.849e-08 | *** |
|            | population                           | 3      | 70.659  | 23.553  | 80.5179  | < 2.2e-16 | *** |
|            | temperature                          | 1      | 69.665  | 69.665  | 238.1569 | < 2.2e-16 | *** |
|            | humidity                             | 1      | 0.252   | 0.252   | 0.8627   | 0.3533686 | .   |
|            | log density                          | 1      | 107.195 | 107.195 | 366.4568 | < 2.2e-16 | *** |
|            | Assay year                           | 1      | 21.361  | 21.361  | 73.0238  | < 2.2e-16 | *** |
|            | block effect                         | 96     | 46.770  | 0.487   | 1.6655   | 0.0002212 | *** |
|            | salt environment x population        | 3      | 6.447   | 2.149   | 7.3460   | 7.698e-05 | *** |
|            | temperature x humidity               | 1      | 0.012   | 0.012   | 0.0420   | 0.8377404 | .   |
|            | temperature x log density            | 1      | 1.128   | 1.128   | 3.8551   | 0.0500663 | .   |
|            | humidity x log density               | 1      | 0.005   | 0.005   | 0.0168   | 0.8969976 | .   |
|            | temperature x humidity x log density | 1      | 0.233   | 0.233   | 0.7976   | 0.3721879 | .   |
|            | Residuals                            | 589    | 172.293 | 0.293   |          |           |     |

|            | Df                                   | Sum Sq | Mean Sq | F value | Pr (>F)   | Sign.     |     |
|------------|--------------------------------------|--------|---------|---------|-----------|-----------|-----|
| Trait : BS | salt environment                     | 1      | 7.167   | 7.167   | 136.2041  | < 2.2e-16 | *** |
|            | population                           | 3      | 32.594  | 10.865  | 206.4898  | < 2.2e-16 | *** |
|            | temperature                          | 1      | 7.736   | 7.736   | 147.0326  | < 2.2e-16 | *** |
|            | humidity                             | 1      | 0.032   | 0.032   | 0.6176    | 0.4322598 | .   |
|            | log density                          | 1      | 58.431  | 58.431  | 1110.5059 | < 2.2e-16 | *** |
|            | Assay year                           | 1      | 4.550   | 4.550   | 86.4687   | < 2.2e-16 | *** |
|            | block effect                         | 96     | 7.960   | 0.083   | 1.5758    | 0.0009149 | *** |
|            | salt environment x population        | 3      | 0.065   | 0.022   | 0.4123    | 0.7442336 | .   |
|            | temperature x humidity               | 1      | 0.035   | 0.035   | 0.6653    | 0.4150272 | .   |
|            | temperature x log density            | 1      | 0.124   | 0.124   | 2.3536    | 0.1255323 | .   |
|            | humidity x log density               | 1      | 0.039   | 0.039   | 0.7480    | 0.3874554 | .   |
|            | temperature x humidity x log density | 1      | 0.011   | 0.011   | 0.2125    | 0.6450113 | .   |
|            | Residuals                            | 589    | 30.991  | 0.053   |           |           |     |

|            | Df                                   | Sum Sq | Mean Sq | F value | Pr (>F)  | Sign.     |     |
|------------|--------------------------------------|--------|---------|---------|----------|-----------|-----|
| Trait : FS | salt environment                     | 1      | 20.891  | 20.891  | 190.9788 | < 2.2e-16 | *** |
|            | population                           | 3      | 39.981  | 13.327  | 121.8293 | < 2.2e-16 | *** |
|            | temperature                          | 1      | 9.531   | 9.531   | 87.1315  | < 2.2e-16 | *** |
|            | humidity                             | 1      | 0.171   | 0.171   | 1.5601   | 0.2121506 | *** |
|            | log density                          | 1      | 124.781 | 124.781 | 140.6942 | < 2.2e-16 | *** |
|            | Assay year                           | 1      | 6.086   | 6.086   | 55.6380  | 3.138e-13 | *** |
|            | block effect                         | 96     | 16.155  | 0.168   | 1.5384   | 0.0016106 | *** |
|            | salt environment x population        | 3      | 1.884   | 0.628   | 5.7405   | 0.0007105 | *** |
|            | temperature x humidity               | 1      | 0.005   | 0.005   | 0.0458   | 0.8305695 | .   |
|            | temperature x log density            | 1      | 0.664   | 0.664   | 6.0734   | 0.0140079 | *   |
|            | humidity x log density               | 1      | 0.180   | 0.180   | 1.6430   | 0.2004148 | .   |
|            | temperature x humidity x log density | 1      | 0.009   | 0.009   | 0.0778   | 0.7804465 | .   |
|            | Residuals                            | 589    | 64.431  | 0.109   |          |           |     |

|            | Df                                   | Sum Sq | Mean Sq | F value | Pr (>F)  | Sign.     |     |
|------------|--------------------------------------|--------|---------|---------|----------|-----------|-----|
| Trait : BF | salt environment                     | 1      | 3.098   | 3.098   | 6.4474   | 0.01137   | *   |
|            | population                           | 3      | 110.036 | 36.679  | 76.3437  | < 2.2e-16 | *** |
|            | temperature                          | 1      | 0.483   | 0.483   | 1.0049   | 0.31654   | .   |
|            | humidity                             | 1      | 2.857   | 2.857   | 5.9467   | 0.01504   | *   |
|            | log density                          | 1      | 118.889 | 118.889 | 247.4584 | < 2.2e-16 | *** |
|            | Assay year                           | 1      | 0.663   | 0.663   | 1.3794   | 0.24067   | .   |
|            | block effect                         | 96     | 101.729 | 1.060   | 2.2056   | 1.076e-08 | *** |
|            | salt environment x population        | 3      | 1.607   | 0.536   | 1.1152   | 0.34225   | .   |
|            | temperature x humidity               | 1      | 1.006   | 1.006   | 2.0934   | 0.14847   | .   |
|            | temperature x log density            | 1      | 11.968  | 11.968  | 24.9112  | 7.916e-07 | *** |
|            | humidity x log density               | 1      | 0.094   | 0.094   | 0.1956   | 0.65847   | .   |
|            | temperature x humidity x log density | 1      | 2.963   | 2.963   | 6.1678   | 0.01329   | *   |
|            | Residuals                            | 589    | 282.980 | 0.480   |          |           |     |

|              | Df                                   | Sum Sq | Mean Sq | F value | Pr (>F)   | Sign.     |     |
|--------------|--------------------------------------|--------|---------|---------|-----------|-----------|-----|
| Trait : Size | salt environment                     | 1      | 746.97  | 746.97  | 2228.2075 | < 2.2e-16 | *** |
|              | population                           | 3      | 88.79   | 29.60   | 88.2885   | < 2.2e-16 | *** |
|              | temperature                          | 1      | 58.52   | 58.52   | 174.5597  | < 2.2e-16 | *** |
|              | humidity                             | 1      | 0.00    | 0.00    | 0.0007    | 0.979245  | .   |
|              | log density                          | 1      | 31.91   | 31.91   | 95.1985   | < 2.2e-16 | *** |
|              | Assay year                           | 1      | 83.38   | 83.38   | 248.7218  | < 2.2e-16 | *** |
|              | block effect                         | 96     | 45.52   | 0.47    | 1.4143    | 0.009258  | *** |
|              | salt environment x population        | 3      | 19.48   | 6.49    | 19.3727   | 5.442e-12 | *** |
|              | temperature x humidity               | 1      | 1.53    | 1.53    | 4.5585    | 0.033168  | *   |
|              | temperature x log density            | 1      | 0.08    | 0.08    | 0.2422    | 0.622780  | .   |
|              | humidity x log density               | 1      | 0.01    | 0.01    | 0.0210    | 0.884725  | .   |
|              | temperature x humidity x log density | 1      | 0.09    | 0.09    | 0.2740    | 0.600842  | .   |
|              | Residuals                            | 589    | 197.45  | 0.34    |           |           |     |

Signif. codes: 0 '\*\*\*' 0.001 '\*\*' 0.01 '\*' 0.05 '.' 0.1 ' ' 1

Raw output from R is available at:

[https://github.com/ExpEvo/WormLab/Mallard\\_Robertson/tree/main/output\\_files/txt/Manova\\_trait\\_responses.txt](https://github.com/ExpEvo/WormLab/Mallard_Robertson/tree/main/output_files/txt/Manova_trait_responses.txt)
