# Supplementary material for: Selection and the direction of phenotypic evolution
Source: eLife journal article supplement (doi:10.7554/elife.80993), 2023-08-31
Supplement: fig1-data5 [file elife-80993-fig1-data5-v2.pdf]

|                     |             |           |           |           |           |           |           |
|---------------------|-------------|-----------|-----------|-----------|-----------|-----------|-----------|
| <b>Eigenvalues:</b> | 805.5       | 2.2 e-13  | 9.0 e-15  | 1.26 e-17 | -5 e16    | -8.7 e-15 | -1.1 e-14 |
| <b>Loadings:</b>    |             |           |           |           |           |           |           |
|                     | <b>pmax</b> | <b>p2</b> | <b>p3</b> | <b>p4</b> | <b>p5</b> | <b>p6</b> | <b>p7</b> |
| <b>SF</b>           | 0.148       | 0.989     | 0         | 0         | 0         | 0         | 0         |
| <b>SB</b>           | -0.103      | 0.015     | 0.912     | 0.003     | 0.003     | -0.307    | 0.253     |
| <b>FS</b>           | 0.161       | -0.024    | -0.375    | -0.066    | 0.097     | -0.746    | 0.512     |
| <b>FB</b>           | -0.039      | 0.006     | 0.032     | -0.966    | 0.241     | 0.044     | -0.07     |
| <b>BS</b>           | 0.094       | -0.014    | 0.042     | -0.008    | -0.151    | -0.569    | -0.801    |
| <b>BF</b>           | 0.062       | -0.009    | -0.022    | -0.251    | -0.951    | 0.036     | 0.163     |
| <b>Size</b>         | -0.963      | 0.144     | -0.159    | 0.01      | -0.07     | -0.147    | -0.007    |

**Raw output from R is available at:**

[https://github.com/ExpEvolWormLab/Mallard\\_Robertson/tree/main/output\\_files/txt/SSCP\\_plasticity\\_ED.txt](https://github.com/ExpEvolWormLab/Mallard_Robertson/tree/main/output_files/txt/SSCP_plasticity_ED.txt)
