# Supplementary material for: Selection and the direction of phenotypic evolution
Source: eLife journal article supplement (doi:10.7554/elife.80993), 2023-08-31
Supplement: fig1-figsupp1-data1 [file elife-80993-fig1-figsupp1-data1-v2.pdf]

| <b>contrast</b>             | <b>trait</b> | <b>estimate</b> | <b>SE</b> | <b>df</b> | <b>t.ratio</b> | <b>p.value</b> |
|-----------------------------|--------------|-----------------|-----------|-----------|----------------|----------------|
| A6140: High Salt - Low Salt | SF           | 0.188           | 0.037     | 662.457   | 5.062          | 1.5 e-05       |
| A6140: High Salt - Low Salt | SB           | -0.194          | 0.041     | 661.29    | -4.684         | 9.3 e-05       |
| A6140: High Salt - Low Salt | FS           | 0.212           | 0.025     | 670.405   | 8.449          | < 1 e-10       |
| A6140: High Salt - Low Salt | FB           | -0.152          | 0.055     | 673.651   | -2.756         | 0.11           |
| A6140: High Salt - Low Salt | BS           | 0.083           | 0.017     | 670.494   | 4.762          | 6.4 e-05       |
| A6140: High Salt - Low Salt | BF           | 0.026           | 0.055     | 666.402   | 0.464          | 0.99           |
| A6140: High Salt - Low Salt | Size         | -1.234          | 0.044     | 682.086   | -27.835        | < 1 e-10       |

**Raw output from R is available at:**

[https://github.com/ExpEvolWormLab/Mallard\\_Robertson/blob/main/output\\_files/txt/Plasticity\\_contrasts.txt](https://github.com/ExpEvolWormLab/Mallard_Robertson/blob/main/output_files/txt/Plasticity_contrasts.txt)
