# Supplementary material for: Selection and the direction of phenotypic evolution
Source: eLife journal article supplement (doi:10.7554/elife.80993), 2023-08-31
Supplement: fig2-data1 [file elife-80993-fig2-data1-v2.pdf]

A6140 in low salt

|      | SF                         | SB                        | FS                         | FB                         | BS                         | BF                         | Size                       |
|------|----------------------------|---------------------------|----------------------------|----------------------------|----------------------------|----------------------------|----------------------------|
| SF   | <b>0.078 [0.054;0.102]</b> | 0.064 [0.043;0.09]        | -0.037 [-0.052;-0.026]     | -0.051 [-0.082;-0.034]     | -0.017 [-0.027;-0.011]     | -0.017 [-0.037;0.002]      | 0.038 [0.015;0.06]         |
| SB   | 0.064 [0.043;0.09]         | <b>0.071 [0.05;0.102]</b> | -0.035 [-0.048;-0.022]     | -0.046 [-0.073;-0.026]     | -0.017 [-0.028;-0.011]     | -0.021 [-0.045;-0.005]     | 0.038 [0.015;0.061]        |
| FS   | -0.037 [-0.052;-0.026]     | -0.035 [-0.048;-0.022]    | <b>0.031 [0.022;0.041]</b> | 0.026 [0.013;0.042]        | 0.015 [0.009;0.021]        | 0.003 [-0.007;0.017]       | -0.024 [-0.038;-0.011]     |
| FB   | -0.051 [-0.082;-0.034]     | -0.046 [-0.073;-0.026]    | 0.026 [0.013;0.042]        | <b>0.127 [0.096;0.172]</b> | 0.015 [0.006;0.026]        | 0.087 [0.059;0.12]         | -0.084 [-0.12;-0.059]      |
| BS   | -0.017 [-0.027;-0.011]     | -0.017 [-0.028;-0.011]    | 0.015 [0.009;0.021]        | 0.015 [0.006;0.026]        | <b>0.012 [0.008;0.016]</b> | 0.007 [-0.002;0.014]       | -0.017 [-0.028;-0.01]      |
| BF   | -0.017 [-0.037;0.002]      | -0.021 [-0.045;-0.005]    | 0.003 [-0.007;0.017]       | 0.087 [0.059;0.12]         | 0.007 [-0.002;0.014]       | <b>0.089 [0.066;0.128]</b> | -0.064 [-0.096;-0.043]     |
| Size | 0.038 [0.015;0.06]         | 0.038 [0.015;0.061]       | -0.024 [-0.038;-0.011]     | -0.084 [-0.12;-0.059]      | -0.017 [-0.028;-0.01]      | -0.064 [-0.096;-0.043]     | <b>0.128 [0.098;0.169]</b> |

A6140 in high salt

|      | SF                        | SB                        | FS                         | FB                         | BS                         | BF                         | Size                       |
|------|---------------------------|---------------------------|----------------------------|----------------------------|----------------------------|----------------------------|----------------------------|
| SF   | <b>0.08 [0.051;0.128]</b> | 0.084 [0.042;0.134]       | -0.045 [-0.075;-0.024]     | -0.079 [-0.127;-0.041]     | -0.023 [-0.039;-0.01]      | -0.063 [-0.11;-0.028]      | 0.043 [0.02;0.069]         |
| SB   | 0.084 [0.042;0.134]       | <b>0.117 [0.069;0.19]</b> | -0.06 [-0.101;-0.034]      | -0.098 [-0.144;-0.038]     | -0.033 [-0.052;-0.015]     | -0.087 [-0.149;-0.043]     | 0.049 [0.024;0.086]        |
| FS   | -0.045 [-0.075;-0.024]    | -0.06 [-0.101;-0.034]     | <b>0.052 [0.032;0.074]</b> | 0.055 [0.028;0.091]        | 0.023 [0.013;0.037]        | 0.05 [0.027;0.089]         | -0.036 [-0.057;-0.02]      |
| FB   | -0.079 [-0.127;-0.041]    | -0.098 [-0.144;-0.038]    | 0.055 [0.028;0.091]        | <b>0.156 [0.095;0.214]</b> | 0.028 [0.012;0.048]        | 0.116 [0.067;0.178]        | -0.054 [-0.087;-0.029]     |
| BS   | -0.023 [-0.039;-0.01]     | -0.033 [-0.052;-0.015]    | 0.023 [0.013;0.037]        | 0.028 [0.012;0.048]        | <b>0.019 [0.012;0.029]</b> | 0.028 [0.013;0.048]        | -0.018 [-0.031;-0.009]     |
| BF   | -0.063 [-0.11;-0.028]     | -0.087 [-0.149;-0.043]    | 0.05 [0.027;0.089]         | 0.116 [0.067;0.178]        | 0.028 [0.013;0.048]        | <b>0.128 [0.083;0.198]</b> | -0.049 [-0.08;-0.024]      |
| Size | 0.043 [0.02;0.069]        | 0.049 [0.024;0.086]       | -0.036 [-0.057;-0.02]      | -0.054 [-0.087;-0.029]     | -0.018 [-0.031;-0.009]     | -0.049 [-0.08;-0.024]      | <b>0.063 [0.046;0.091]</b> |

Raw output from R is available at:

[https://github.com/ExpEvolWormLab/Mallard\\_Robertson/tree/main/output\\_files/txt/output\\_files/G\\_mat\\_tables/](https://github.com/ExpEvolWormLab/Mallard_Robertson/tree/main/output_files/txt/output_files/G_mat_tables/)
