# Supplementary material for: Selection and the direction of phenotypic evolution
Source: eLife journal article supplement (doi:10.7554/elife.80993), 2023-08-31
Supplement: fig2-data2 [file elife-80993-fig2-data2-v2.pdf]

|                        | A6140 - Low Salt |        |        |        |        |        |        | A6140 - High Salt |        |        |        |        |        |        |
|------------------------|------------------|--------|--------|--------|--------|--------|--------|-------------------|--------|--------|--------|--------|--------|--------|
|                        | $g_{\max}$       | $g_2$  | $g_3$  | $g_4$  | $g_5$  | $g_6$  | $g_7$  | $g_{\max}$        | $g_2$  | $g_3$  | $g_4$  | $g_5$  | $g_6$  | $g_7$  |
| Eigenvalues            | 0.356            | 0.113  | 0.05   | 0.02   | 0.009  | 0.005  | 0.003  | 0.488             | 0.06   | 0.039  | 0.03   | 0.014  | 0.008  | 0.005  |
| HPD lower              | 0.257            | 0.078  | 0.036  | 0.015  | 0.007  | 0.004  | 0.002  | 0.271             | 0.046  | 0.03   | 0.022  | 0.011  | 0.007  | 0.004  |
| HPD upper              | 0.449            | 0.156  | 0.068  | 0.029  | 0.014  | 0.006  | 0.004  | 0.697             | 0.09   | 0.052  | 0.038  | 0.02   | 0.011  | 0.007  |
| Proportion             | 0.64             | 0.203  | 0.09   | 0.036  | 0.016  | 0.009  | 0.005  | 0.758             | 0.093  | 0.061  | 0.047  | 0.022  | 0.012  | 0.008  |
| <i>Trait loadings:</i> |                  |        |        |        |        |        |        |                   |        |        |        |        |        |        |
| SF                     | -0.334           | 0.554  | 0.097  | -0.004 | 0.595  | 0.467  | 0      | -0.36             | -0.388 | 0.241  | 0.283  | -0.466 | 0.58   | 0.165  |
| SB                     | -0.32            | 0.506  | 0.087  | 0.541  | -0.252 | -0.521 | -0.083 | -0.459            | -0.409 | 0.394  | -0.186 | -0.057 | -0.611 | -0.234 |
| FS                     | 0.179            | -0.334 | 0.076  | 0.389  | 0.548  | -0.186 | -0.603 | 0.267             | 0.303  | 0.129  | 0.24   | -0.693 | -0.443 | 0.296  |
| FB                     | 0.568            | 0.208  | -0.419 | 0.543  | -0.087 | 0.362  | 0.16   | 0.532             | -0.502 | -0.117 | -0.585 | -0.316 | 0.088  | -0.05  |
| BS                     | 0.107            | -0.125 | 0.079  | 0.12   | 0.48   | -0.401 | 0.749  | 0.142             | 0.153  | 0.035  | 0.225  | -0.257 | 0.118  | -0.908 |
| BF                     | 0.396            | 0.461  | -0.36  | -0.495 | 0.182  | -0.425 | -0.207 | 0.467             | -0.496 | 0.15   | 0.619  | 0.323  | -0.157 | 0.038  |
| Size                   | -0.513           | -0.234 | -0.816 | 0.045  | 0.106  | -0.055 | 0.017  | -0.258            | -0.264 | -0.856 | 0.227  | -0.173 | -0.22  | -0.041 |

Raw output from R is available at:

[https://github.com/ExpEvolWormLab/Mallard\\_Robertson/tree/main/output\\_files/txt/output\\_files/G\\_matrix\\_eigendecomposition/](https://github.com/ExpEvolWormLab/Mallard_Robertson/tree/main/output_files/txt/output_files/G_matrix_eigendecomposition/)
