# Supplementary material for: Selection and the direction of phenotypic evolution
Source: eLife journal article supplement (doi:10.7554/elife.80993), 2023-08-31
Supplement: fig3-data1 [file elife-80993-fig3-data1-v2.pdf]

**Figure 3A:**

**Null**

95% CI [0.13 - 0.28]

**Observed**

Mean 0.17

83% CI [0.13 - 0.22]

95% CI [0.11 - 0.24]

**Figure 3B:**

**Null**

83% CI [57.5 - 90.0]

95% CI [45.8 - 90.0]

**Observed**

|        | gmax          | g2            | g3            |
|--------|---------------|---------------|---------------|
| Mean   | 71.7          | 74.2          | 51.4          |
| 83% CI | [67.6 - 75.0] | [64.1 - 90.0] | [22.3 - 74.8] |
| 95% CI | [66.5 - 72.3] | [54.1 - 90.0] | [23.2 - 87.6] |
