# Supplementary material for: Selection and the direction of phenotypic evolution
Source: eLife journal article supplement (doi:10.7554/elife.80993), 2023-08-31
Supplement: fig4-data1 [file elife-80993-fig4-data1-v2.pdf]

| Trait  | Environment | Posterior Mode | 83% CI |        | 95% CI |        |
|--------|-------------|----------------|--------|--------|--------|--------|
|        |             |                | lower  | upper  | lower  | upper  |
| SF*w   | High Salt   | 0.035          | 0.018  | 0.06   | 0.011  | 0.073  |
| SB*w   | High Salt   | 0.073          | 0.042  | 0.099  | 0.032  | 0.113  |
| FS*w   | High Salt   | -0.044         | -0.062 | -0.027 | -0.072 | -0.023 |
| FB*w   | High Salt   | -0.055         | -0.087 | -0.033 | -0.101 | -0.023 |
| BS*w   | High Salt   | -0.03          | -0.042 | -0.02  | -0.049 | -0.016 |
| BF*w   | High Salt   | -0.076         | -0.099 | -0.045 | -0.115 | -0.035 |
| Size*w | High Salt   | 0.05           | 0.034  | 0.068  | 0.028  | 0.077  |
| w      | High Salt   | 0.22           | 0.188  | 0.255  | 0.176  | 0.271  |
| SF*w   | Low Salt    | 0.002          | -0.012 | 0.022  | -0.02  | 0.03   |
| SB*w   | Low Salt    | 0.017          | -0.002 | 0.034  | -0.007 | 0.044  |
| FS*w   | Low Salt    | -0.014         | -0.025 | -0.003 | -0.032 | 0.001  |
| FB*w   | Low Salt    | -0.031         | -0.049 | -0.005 | -0.058 | 0.006  |
| BS*w   | Low Salt    | -0.011         | -0.02  | -0.004 | -0.024 | -0.001 |
| BF*w   | Low Salt    | -0.026         | -0.05  | -0.01  | -0.057 | 6 e-5  |
| Size*w | Low Salt    | 0.065          | 0.051  | 0.095  | 0.044  | 0.108  |

Raw output from R is available at:

[https://github.com/ExpEvolWormLab/Mallard\\_Robertson/blob/main/output\\_files/txt/Selection\\_differentials.txt](https://github.com/ExpEvolWormLab/Mallard_Robertson/blob/main/output_files/txt/Selection_differentials.txt)
