# Supplementary material for: Selection and the direction of phenotypic evolution
Source: eLife journal article supplement (doi:10.7554/elife.80993), 2023-08-31
Supplement: fig6-data2 [file elife-80993-fig6-data2-v2.pdf]

|                  | contrast      | trait  | estimate | SE      | df      | t.ratio | p.value  |
|------------------|---------------|--------|----------|---------|---------|---------|----------|
| <b>High Salt</b> | A6140 - GA150 | SF     | -0.03    | 0.054   | 687.668 | -0.568  | 0.99     |
|                  | A6140 - GA250 | SF     | -0.252   | 0.056   | 735.093 | -4.505  | 2.1 e-05 |
|                  | A6140 - GA450 | SF     | -0.05    | 0.062   | 684.893 | -0.804  | 0.99     |
|                  | A6140 - GA150 | SB     | -0.148   | 0.06    | 687.718 | -2.475  | 0.21     |
|                  | A6140 - GA250 | SB     | -0.317   | 0.063   | 733.219 | -5.055  | 1.5 e-05 |
|                  | A6140 - GA450 | SB     | -0.294   | 0.069   | 683.122 | -4.227  | 7.0 e-04 |
|                  | A6140 - GA150 | FS     | 0.117    | 0.036   | 692.681 | 3.241   | 0.027    |
|                  | A6140 - GA250 | FS     | 0.129    | 0.038   | 741.552 | 3.436   | 0.014    |
|                  | A6140 - GA450 | FS     | 0.143    | 0.042   | 691.12  | 3.407   | 0.015    |
|                  | A6140 - GA150 | FB     | 0.277    | 0.08    | 694.743 | 3.481   | 0.012    |
|                  | A6140 - GA250 | FB     | 0.441    | 0.083   | 743.203 | 5.338   | 3.5 e-06 |
|                  | A6140 - GA450 | FB     | 0.125    | 0.092   | 693.096 | 1.351   | 0.88     |
|                  | A6140 - GA150 | BS     | 0.09     | 0.025   | 692.857 | 3.557   | 9.5 e-03 |
|                  | A6140 - GA250 | BS     | 0.117    | 0.026   | 741.393 | 4.472   | 2.4 e-04 |
|                  | A6140 - GA450 | BS     | 0.147    | 0.029   | 691.012 | 5.026   | 1.8 e-05 |
|                  | A6140 - GA150 | BF     | 0.383    | 0.079   | 691.011 | 4.823   | 4.7 e-05 |
|                  | A6140 - GA250 | BF     | 0.341    | 0.083   | 737.288 | 4.12    | 0.0011   |
|                  | A6140 - GA450 | BF     | 0.297    | 0.092   | 687.091 | 3.23    | 0.028    |
| A6140 - GA150    | Size          | -0.051 | 0.064    | 698.9   | -0.804  | 0.99    |          |
| A6140 - GA250    | Size          | -0.204 | 0.066    | 746.862 | -3.099  | 0.042   |          |
| A6140 - GA450    | Size          | -0.078 | 0.074    | 698.483 | -1.058  | 0.96    |          |

Raw output from R is available at:

[https://github.com/ExpEvolWormLab/Mallard\\_Robertson/blob/main/output\\_files/txt/Divergence\\_contrasts\\_High\\_Salt.txt](https://github.com/ExpEvolWormLab/Mallard_Robertson/blob/main/output_files/txt/Divergence_contrasts_High_Salt.txt)
