# Supplementary material for: Selection and the direction of phenotypic evolution
Source: eLife journal article supplement (doi:10.7554/elife.80993), 2023-08-31
Supplement: fig6-data3 [file elife-80993-fig6-data3-v2.pdf]

|                     |             |           |           |           |           |           |           |
|---------------------|-------------|-----------|-----------|-----------|-----------|-----------|-----------|
| <b>Eigenvalues:</b> | 483         | 15.4      | 7.5       | 8 e-15    | 7 e-15    | -7 e-15   | -2 e-14   |
| <b>Loadings:</b>    |             |           |           |           |           |           |           |
|                     | <b>dmax</b> | <b>d2</b> | <b>d3</b> | <b>d4</b> | <b>d5</b> | <b>d6</b> | <b>d7</b> |
| <b>SF</b>           | -0.225      | -0.253    | 0.62      | 0         | 0         | 0         | 0.708     |
| <b>SB</b>           | -0.365      | -0.616    | 0.282     | 0.186     | -0.122    | -0.142    | -0.582    |
| <b>FS</b>           | 0.284       | 0.155     | 0.28      | 0.747     | 0.484     | 0.121     | -0.099    |
| <b>FB</b>           | 0.517       | -0.578    | -0.38     | 0.271     | -0.198    | -0.241    | 0.29      |
| <b>BS</b>           | 0.253       | 0.26      | 0.31      | 0.214     | -0.817    | 0.223     | -0.098    |
| <b>BF</b>           | 0.473       | -0.33     | 0.226     | -0.441    | 0.195     | 0.598     | -0.165    |
| <b>Size</b>         | -0.425      | -0.15     | -0.409    | 0.306     | -0.081    | 0.707     | 0.17      |

**Raw output from R is available at:**

[https://github.com/ExpEvolWormLab/Mallard\\_Robertson/tree/main/output\\_files/txt/SSCP\\_divergence\\_ED.txt](https://github.com/ExpEvolWormLab/Mallard_Robertson/tree/main/output_files/txt/SSCP_divergence_ED.txt)
