# Supplementary material for: Selection and the direction of phenotypic evolution
Source: eLife journal article supplement (doi:10.7554/elife.80993), 2023-08-31
Supplement: fig6-figsupp2-data1 [file elife-80993-fig6-figsupp2-data1-v2.pdf]

|                 | contrast      | trait  | estimate | SE      | df      | t.ratio | p.value  |
|-----------------|---------------|--------|----------|---------|---------|---------|----------|
| <b>Low Salt</b> | A6140 - GA150 | SF     | 0.24     | 0.054   | 693.317 | 4.473   | 2.4 e-04 |
|                 | A6140 - GA250 | SF     | 0.004    | 0.054   | 694.498 | 0.071   | 0.99     |
|                 | A6140 - GA450 | SF     | 0.104    | 0.062   | 686.124 | 1.678   | 0.70     |
|                 | A6140 - GA150 | SB     | 0.206    | 0.06    | 694.078 | 3.447   | 0.01     |
|                 | A6140 - GA250 | SB     | -0.118   | 0.06    | 693.758 | -1.962  | 0.51     |
|                 | A6140 - GA450 | SB     | -0.054   | 0.069   | 684.824 | -0.776  | 0.99     |
|                 | A6140 - GA150 | FS     | -0.012   | 0.036   | 696.53  | -0.334  | 0.99     |
|                 | A6140 - GA250 | FS     | -0.037   | 0.036   | 698.661 | -1.02   | 0.97     |
|                 | A6140 - GA450 | FS     | -0.005   | 0.042   | 691.17  | -0.123  | 0.99     |
|                 | A6140 - GA150 | FB     | 0.252    | 0.079   | 698.075 | 3.174   | 0.034    |
|                 | A6140 - GA250 | FB     | 0.375    | 0.08    | 699.836 | 4.711   | 8.1 e-05 |
|                 | A6140 - GA450 | FB     | 0.003    | 0.092   | 692.826 | 0.033   | 0.99     |
|                 | A6140 - GA150 | BS     | 0.072    | 0.025   | 696.808 | 2.853   | 0.084    |
|                 | A6140 - GA250 | BS     | 0.08     | 0.025   | 698.612 | 3.18    | 0.032    |
|                 | A6140 - GA450 | BS     | 0.15     | 0.029   | 691.145 | 5.139   | 9.9 e-06 |
|                 | A6140 - GA150 | BF     | 0.297    | 0.079   | 696.378 | 3.749   | 0.0047   |
|                 | A6140 - GA250 | BF     | 0.379    | 0.079   | 696.332 | 4.766   | 6.2 e-05 |
|                 | A6140 - GA450 | BF     | 0.129    | 0.092   | 688.209 | 1.406   | 0.85     |
| A6140 - GA150   | Size          | -0.45  | 0.063    | 700.232 | -7.093  | 0       |          |
| A6140 - GA250   | Size          | -0.707 | 0.064    | 702.494 | -11.106 | 0       |          |
| A6140 - GA450   | Size          | -0.573 | 0.074    | 696.848 | -7.783  | 0       |          |

Raw output from R is available at:

[https://github.com/ExpEvolWormLab/Mallard\\_Robertson/blob/main/output\\_files/txt/Divergence\\_contrasts\\_Low\\_Salt.txt](https://github.com/ExpEvolWormLab/Mallard_Robertson/blob/main/output_files/txt/Divergence_contrasts_Low_Salt.txt)
