# Supplementary material for: Selection and the direction of phenotypic evolution
Source: eLife journal article supplement (doi:10.7554/elife.80993), 2023-08-31
Supplement: fig7-data1 [file elife-80993-fig7-data1-v2.pdf]

## GA150 in low salt

|      | SF                         | SB                         | FS                        | FB                         | BS                         | BF                        | Size                       |
|------|----------------------------|----------------------------|---------------------------|----------------------------|----------------------------|---------------------------|----------------------------|
| SF   | <b>0.029 [0.015;0.064]</b> | 0.024 [0.005;0.056]        | -0.002 [-0.016;0.005]     | -0.003 [-0.034;0.022]      | -0.002 [-0.013;0.005]      | 0.003 [-0.021;0.031]      | 0.008 [-0.015;0.038]       |
| SB   | 0.024 [0.005;0.056]        | <b>0.039 [0.019;0.079]</b> | -0.006 [-0.023;0.005]     | 0.003 [-0.03;0.033]        | -0.004 [-0.016;0.003]      | 0.003 [-0.021;0.038]      | 0.006 [-0.017;0.042]       |
| FS   | -0.002 [-0.016;0.005]      | -0.006 [-0.02;0.005]       | <b>0.01 [0.006;0.021]</b> | -0.009 [-0.022;0.008]      | 0.005 [0;0.011]            | -0.008 [-0.023;0.006]     | 0.004 [-0.015;0.016]       |
| FB   | -0.003 [-0.034;0.022]      | 0.003 [-0.03;0.033]        | -0.009 [-0.022;0.008]     | <b>0.073 [0.037;0.147]</b> | -0.004 [-0.017;0.008]      | 0.047 [0.015;0.108]       | -0.027 [-0.077;0.005]      |
| BS   | -0.002 [-0.013;0.005]      | -0.004 [-0.016;0.003]      | 0.005 [0;0.011]           | -0.004 [-0.017;0.008]      | <b>0.007 [0.004;0.013]</b> | -0.004 [-0.015;0.008]     | -0.003 [-0.016;0.008]      |
| BF   | 0.003 [-0.021;0.031]       | 0.003 [-0.021;0.038]       | -0.008 [-0.023;0.006]     | 0.047 [0.015;0.108]        | -0.004 [-0.015;0.008]      | <b>0.061 [0.03;0.124]</b> | -0.024 [-0.064;0.01]       |
| Size | 0.008 [-0.015;0.038]       | 0.006 [-0.017;0.042]       | 0.004 [-0.015;0.016]      | -0.027 [-0.077;0.005]      | -0.003 [-0.016;0.008]      | -0.024 [-0.064;0.01]      | <b>0.067 [0.034;0.134]</b> |

## GA150 in high salt

|      | SF                       | SB                         | FS                         | FB                         | BS                        | BF                         | Size                      |
|------|--------------------------|----------------------------|----------------------------|----------------------------|---------------------------|----------------------------|---------------------------|
| SF   | <b>0.04 [0.018;0.07]</b> | 0.027 [0.007;0.059]        | -0.011 [-0.027;-0.001]     | -0.018 [-0.048;0.006]      | -0.002 [-0.016;0.003]     | 0.001 [-0.02;0.022]        | 0.023 [0.002;0.056]       |
| SB   | 0.027 [0.007;0.059]      | <b>0.048 [0.024;0.089]</b> | -0.013 [-0.031;-0.001]     | 0.005 [-0.026;0.032]       | -0.009 [-0.024;-0.001]    | 0.003 [-0.022;0.026]       | 0.021 [-0.003;0.055]      |
| FS   | -0.011 [-0.027;-0.001]   | -0.013 [-0.031;-0.001]     | <b>0.015 [0.008;0.028]</b> | 0.005 [-0.011;0.024]       | 0.005 [0.001;0.014]       | -0.002 [-0.014;0.013]      | -0.009 [-0.031;0.002]     |
| FB   | -0.018 [-0.048;0.006]    | 0.005 [-0.026;0.032]       | 0.005 [-0.011;0.024]       | <b>0.085 [0.048;0.142]</b> | -0.001 [-0.014;0.011]     | 0.034 [0.009;0.076]        | -0.025 [-0.058;0.005]     |
| BS   | -0.002 [-0.016;0.003]    | -0.009 [-0.024;-0.001]     | 0.005 [0.001;0.014]        | -0.001 [-0.014;0.011]      | <b>0.01 [0.006;0.018]</b> | 0.001 [-0.009;0.013]       | -0.008 [-0.023;0.002]     |
| BF   | 0.001 [-0.02;0.022]      | 0.003 [-0.022;0.026]       | -0.002 [-0.014;0.013]      | 0.034 [0.009;0.076]        | 0.001 [-0.009;0.013]      | <b>0.047 [0.028;0.093]</b> | -0.003 [-0.032;0.021]     |
| Size | 0.023 [0.002;0.056]      | 0.021 [-0.003;0.055]       | -0.009 [-0.031;0.002]      | -0.025 [-0.058;0.005]      | -0.008 [-0.023;0.002]     | -0.003 [-0.032;0.021]      | <b>0.06 [0.032;0.111]</b> |

## GA250 in low salt

|      | SF                        | SB                         | FS                        | FB                        | BS                         | BF                         | Size                       |
|------|---------------------------|----------------------------|---------------------------|---------------------------|----------------------------|----------------------------|----------------------------|
| SF   | <b>0.045 [0.02;0.081]</b> | 0.041 [0.015;0.079]        | -0.007 [-0.023;0.005]     | -0.001 [-0.028;0.022]     | -0.004 [-0.017;0.003]      | 0.006 [-0.018;0.039]       | 0.024 [-0.003;0.063]       |
| SB   | 0.041 [0.015;0.079]       | <b>0.054 [0.028;0.101]</b> | -0.005 [-0.022;0.008]     | 0.002 [-0.025;0.03]       | -0.007 [-0.019;0.003]      | 0.003 [-0.023;0.04]        | 0.034 [0;0.073]            |
| FS   | -0.007 [-0.023;0.005]     | -0.005 [-0.022;0.008]      | <b>0.016 [0.009;0.03]</b> | -0.003 [-0.017;0.013]     | 0.008 [0.002;0.015]        | -0.01 [-0.03;0.004]        | -0.01 [-0.034;0.006]       |
| FB   | -0.001 [-0.028;0.022]     | 0.002 [-0.025;0.03]        | -0.003 [-0.017;0.013]     | <b>0.05 [0.024;0.093]</b> | -0.002 [-0.015;0.007]      | 0.029 [0.002;0.07]         | -0.02 [-0.064;0.01]        |
| BS   | -0.004 [-0.017;0.003]     | -0.007 [-0.019;0.003]      | 0.008 [0.002;0.015]       | -0.003 [-0.015;0.007]     | <b>0.009 [0.005;0.016]</b> | -0.005 [-0.018;0.006]      | -0.011 [-0.026;0.003]      |
| BF   | 0.006 [-0.018;0.039]      | 0.003 [-0.023;0.04]        | -0.01 [-0.03;0.004]       | 0.029 [0.002;0.07]        | -0.005 [-0.018;0.006]      | <b>0.056 [0.027;0.111]</b> | -0.019 [-0.059;0.02]       |
| Size | 0.024 [-0.003;0.063]      | 0.034 [0;0.073]            | -0.01 [-0.034;0.006]      | -0.02 [-0.064;0.01]       | -0.011 [-0.026;0.003]      | -0.019 [-0.059;0.02]       | <b>0.098 [0.058;0.185]</b> |

## GA250 in high salt

|      | SF                        | SB                         | FS                        | FB                         | BS                         | BF                         | Size                       |
|------|---------------------------|----------------------------|---------------------------|----------------------------|----------------------------|----------------------------|----------------------------|
| SF   | <b>0.03 [0.014;0.066]</b> | 0.015 [0.002;0.049]        | -0.003 [-0.022;0.006]     | -0.019 [-0.044;0.005]      | -0.001 [-0.013;0.008]      | 0.002 [-0.021;0.028]       | 0.012 [-0.012;0.041]       |
| SB   | 0.015 [0.002;0.049]       | <b>0.034 [0.015;0.068]</b> | -0.009 [-0.026;0.003]     | -0.005 [-0.029;0.019]      | -0.007 [-0.02;0.002]       | -0.011 [-0.029;0.019]      | 0.019 [-0.005;0.048]       |
| FS   | -0.003 [-0.022;0.006]     | -0.009 [-0.026;0.003]      | <b>0.02 [0.011;0.036]</b> | 0.002 [-0.013;0.018]       | 0.009 [0.003;0.02]         | 0.003 [-0.014;0.018]       | -0.012 [-0.034;0.001]      |
| FB   | -0.019 [-0.044;0.005]     | -0.005 [-0.029;0.019]      | 0.002 [-0.013;0.018]      | <b>0.067 [0.033;0.108]</b> | -0.003 [-0.016;0.009]      | 0.026 [0.001;0.066]        | -0.003 [-0.037;0.022]      |
| BS   | -0.001 [-0.013;0.008]     | -0.007 [-0.02;0.002]       | 0.009 [0.003;0.02]        | -0.003 [-0.016;0.009]      | <b>0.012 [0.006;0.021]</b> | 0.004 [-0.01;0.014]        | -0.01 [-0.029;-0.001]      |
| BF   | 0.002 [-0.021;0.028]      | -0.011 [-0.029;0.019]      | 0.003 [-0.014;0.018]      | 0.026 [0.001;0.066]        | 0.004 [-0.01;0.014]        | <b>0.062 [0.029;0.106]</b> | -0.007 [-0.037;0.022]      |
| Size | 0.012 [-0.012;0.041]      | 0.019 [-0.005;0.048]       | -0.012 [-0.034;0.001]     | -0.003 [-0.037;0.022]      | -0.01 [-0.029;-0.001]      | -0.007 [-0.037;0.022]      | <b>0.063 [0.028;0.113]</b> |

## GA450 in low salt

|      | SF                         | SB                        | FS                        | FB                         | BS                         | BF                         | Size                      |
|------|----------------------------|---------------------------|---------------------------|----------------------------|----------------------------|----------------------------|---------------------------|
| SF   | <b>0.038 [0.017;0.079]</b> | 0.019 [0.001;0.059]       | -0.005 [-0.03;0.009]      | -0.01 [-0.055;0.041]       | -0.001 [-0.021;0.011]      | 0 [-0.036;0.057]           | 0.009 [-0.033;0.062]      |
| SB   | 0.019 [0.001;0.059]        | <b>0.038 [0.02;0.087]</b> | -0.002 [-0.029;0.012]     | 0.011 [-0.04;0.06]         | -0.003 [-0.024;0.01]       | 0.007 [-0.027;0.071]       | 0.009 [-0.044;0.051]      |
| FS   | -0.005 [-0.03;0.009]       | -0.002 [-0.029;0.012]     | <b>0.019 [0.01;0.046]</b> | -0.004 [-0.041;0.026]      | 0.011 [0.001;0.028]        | -0.013 [-0.054;0.015]      | -0.017 [-0.055;0.013]     |
| FB   | -0.01 [-0.055;0.041]       | 0.011 [-0.04;0.06]        | -0.004 [-0.041;0.026]     | <b>0.143 [0.076;0.273]</b> | -0.018 [-0.051;0.007]      | 0.099 [0.033;0.21]         | -0.075 [-0.163;-0.008]    |
| BS   | -0.001 [-0.021;0.011]      | -0.003 [-0.024;0.01]      | 0.011 [0.001;0.028]       | -0.018 [-0.051;0.007]      | <b>0.013 [0.006;0.032]</b> | -0.021 [-0.057;0.003]      | -0.004 [-0.038;0.016]     |
| BF   | 0 [-0.036;0.057]           | 0.007 [-0.027;0.071]      | -0.013 [-0.054;0.015]     | 0.099 [0.033;0.21]         | -0.021 [-0.057;0.003]      | <b>0.136 [0.058;0.257]</b> | -0.057 [-0.137;0.013]     |
| Size | 0.009 [-0.033;0.062]       | 0.009 [-0.044;0.051]      | -0.017 [-0.055;0.013]     | -0.075 [-0.163;-0.008]     | -0.004 [-0.038;0.016]      | -0.057 [-0.137;0.013]      | <b>0.156 [0.075;0.27]</b> |

## GA450 in high salt

|      | SF                        | SB                         | FS                        | FB                         | BS                        | BF                         | Size                       |
|------|---------------------------|----------------------------|---------------------------|----------------------------|---------------------------|----------------------------|----------------------------|
| SF   | <b>0.082 [0.04;0.147]</b> | 0.05 [0.018;0.116]         | -0.024 [-0.058;-0.002]    | -0.055 [-0.122;-0.013]     | -0.007 [-0.029;0.01]      | -0.022 [-0.07;0.017]       | 0.044 [0.007;0.094]        |
| SB   | 0.05 [0.018;0.116]        | <b>0.084 [0.036;0.147]</b> | -0.025 [-0.062;-0.005]    | -0.037 [-0.099;0.008]      | -0.013 [-0.039;0.001]     | -0.025 [-0.074;0.013]      | 0.032 [0;0.085]            |
| FS   | -0.024 [-0.058;-0.002]    | -0.025 [-0.062;-0.005]     | <b>0.029 [0.015;0.06]</b> | 0.02 [-0.005;0.067]        | 0.009 [0.001;0.029]       | 0.013 [-0.008;0.05]        | -0.019 [-0.055;-0.002]     |
| FB   | -0.055 [-0.122;-0.013]    | -0.037 [-0.099;0.008]      | 0.02 [-0.005;0.067]       | <b>0.128 [0.068;0.242]</b> | 0.003 [-0.021;0.031]      | 0.057 [0.014;0.142]        | -0.043 [-0.102;-0.001]     |
| BS   | -0.007 [-0.029;0.01]      | -0.013 [-0.039;0.001]      | 0.009 [0.001;0.029]       | 0.003 [-0.021;0.031]       | <b>0.014 [0.008;0.03]</b> | 0.006 [-0.013;0.028]       | -0.009 [-0.032;0.005]      |
| BF   | -0.022 [-0.07;0.017]      | -0.025 [-0.074;0.013]      | 0.013 [-0.008;0.05]       | 0.057 [0.014;0.142]        | 0.006 [-0.013;0.028]      | <b>0.087 [0.044;0.168]</b> | -0.015 [-0.06;0.02]        |
| Size | 0.044 [0.007;0.094]       | 0.032 [0;0.085]            | -0.019 [-0.055;-0.002]    | -0.043 [-0.102;-0.001]     | -0.009 [-0.032;0.005]     | -0.015 [-0.06;0.02]        | <b>0.061 [0.027;0.121]</b> |

Raw output from R is available at:

[https://github.com/ExpEvolWormLab/Mallard\\_Robertson/tree/main/output\\_files/txt/output\\_files/G\\_mat\\_tables/](https://github.com/ExpEvolWormLab/Mallard_Robertson/tree/main/output_files/txt/output_files/G_mat_tables/)
