# Supplementary material for: Selection and the direction of phenotypic evolution
Source: eLife journal article supplement (doi:10.7554/elife.80993), 2023-08-31
Supplement: fig7-figsupp1-data1 [file elife-80993-fig7-figsupp1-data1-v2.pdf]

|                        | GA150 - Low Salt |           |           |           |           |           |        | GA150 - High Salt |           |           |           |           |           |        |
|------------------------|------------------|-----------|-----------|-----------|-----------|-----------|--------|-------------------|-----------|-----------|-----------|-----------|-----------|--------|
|                        | $\beta_{\max}$   | $\beta_2$ | $\beta_3$ | $\beta_4$ | $\beta_5$ | $\beta_6$ | $g_7$  | $\beta_{\max}$    | $\beta_2$ | $\beta_3$ | $\beta_4$ | $\beta_5$ | $\beta_6$ | $g_7$  |
| Eigenvalues            | 0.157            | 0.07      | 0.036     | 0.019     | 0.011     | 0.008     | 0.003  | 0.147             | 0.088     | 0.035     | 0.02      | 0.01      | 0.007     | 0.004  |
| HPD lower              | 0.085            | 0.039     | 0.023     | 0.013     | 0.008     | 0.005     | 0.002  | 0.086             | 0.046     | 0.023     | 0.014     | 0.008     | 0.005     | 0.003  |
| HPD upper              | 0.294            | 0.129     | 0.062     | 0.029     | 0.017     | 0.011     | 0.005  | 0.254             | 0.136     | 0.056     | 0.034     | 0.017     | 0.01      | 0.006  |
| Proportion             | 0.516            | 0.23      | 0.118     | 0.062     | 0.036     | 0.026     | 0.01   | 0.473             | 0.283     | 0.113     | 0.064     | 0.032     | 0.023     | 0.013  |
| <i>Trait loadings:</i> |                  |           |           |           |           |           |        |                   |           |           |           |           |           |        |
| SF                     | 0.034            | -0.529    | -0.307    | -0.19     | -0.411    | 0.645     | -0.056 | -0.363            | -0.338    | 0.162     | 0.491     | -0.472    | 0.45      | 0.247  |
| SB                     | -0.013           | -0.663    | -0.398    | 0.251     | 0.146     | -0.56     | 0.066  | -0.236            | -0.568    | 0.517     | -0.055    | 0.098     | -0.569    | -0.13  |
| FS                     | 0.096            | 0.122     | 0.03      | -0.077    | -0.714    | -0.317    | 0.6    | 0.132             | 0.18      | -0.098    | -0.11     | -0.629    | -0.535    | 0.497  |
| FB                     | -0.659           | -0.141    | 0.368     | 0.59      | -0.215    | 0.13      | 0.005  | 0.676             | -0.484    | 0.117     | -0.372    | -0.243    | 0.311     | -0.037 |
| BS                     | 0.029            | 0.113     | -0.054    | -0.011    | -0.5      | -0.325    | -0.792 | 0.06              | 0.123     | -0.079    | 0.214     | -0.499    | -0.141    | -0.812 |
| BF                     | -0.578           | -0.19     | 0.189     | -0.738    | 0.066     | -0.211    | -0.006 | 0.295             | -0.419    | -0.58     | 0.532     | 0.215     | -0.26     | 0.068  |
| Size                   | 0.47             | -0.444    | 0.757     | -0.045    | -0.009    | -0.054    | -0.068 | -0.498            | -0.326    | -0.583    | -0.526    | -0.133    | 0.05      | -0.095 |
|                        | GA250 - Low Salt |           |           |           |           |           |        | GA250 - High Salt |           |           |           |           |           |        |
|                        | $\beta_{\max}$   | $\beta_2$ | $\beta_3$ | $\beta_4$ | $\beta_5$ | $\beta_6$ | $g_7$  | $\beta_{\max}$    | $\beta_2$ | $\beta_3$ | $\beta_4$ | $\beta_5$ | $\beta_6$ | $g_7$  |
| Eigenvalues            | 0.183            | 0.088     | 0.04      | 0.023     | 0.011     | 0.007     | 0.003  | 0.121             | 0.069     | 0.04      | 0.023     | 0.014     | 0.007     | 0.004  |
| HPD lower              | 0.106            | 0.047     | 0.025     | 0.015     | 0.007     | 0.005     | 0.002  | 0.078             | 0.041     | 0.026     | 0.015     | 0.008     | 0.005     | 0.003  |
| HPD upper              | 0.288            | 0.157     | 0.067     | 0.035     | 0.018     | 0.01      | 0.005  | 0.22              | 0.118     | 0.064     | 0.038     | 0.021     | 0.011     | 0.006  |
| Proportion             | 0.515            | 0.248     | 0.113     | 0.065     | 0.031     | 0.02      | 0.008  | 0.435             | 0.248     | 0.144     | 0.083     | 0.05      | 0.025     | 0.014  |
| <i>Trait loadings:</i> |                  |           |           |           |           |           |        |                   |           |           |           |           |           |        |
| SF                     | -0.374           | -0.355    | 0.461     | -0.136    | -0.077    | 0.64      | 0.296  | -0.27             | 0.113     | -0.509    | -0.351    | 0.228     | 0.688     | 0.08   |
| SB                     | -0.459           | -0.375    | 0.417     | 0.162     | 0.043     | -0.599    | -0.297 | -0.32             | 0.293     | 0.022     | -0.694    | 0.14      | -0.556    | -0.015 |
| FS                     | 0.086            | 0.149     | 0.229     | 0.323     | 0.755     | -0.097    | 0.484  | 0.142             | -0.201    | -0.057    | 0.112     | 0.82      | -0.11     | -0.488 |
| FB                     | 0.206            | -0.533    | -0.282    | 0.74      | -0.139    | 0.162     | 0.016  | 0.585             | 0.489     | 0.469     | -0.247    | 0.194     | 0.293     | 0.118  |
| BS                     | 0.095            | 0.096     | 0.163     | 0.108     | 0.421     | 0.42      | -0.768 | 0.091             | -0.185    | -0.12     | 0.101     | 0.399     | -0.203    | 0.856  |
| BF                     | 0.178            | -0.632    | -0.32     | -0.531    | 0.424     | -0.074    | -0.008 | 0.527             | 0.33      | -0.708    | 0.065     | -0.156    | -0.276    | -0.084 |
| Size                   | -0.748           | 0.139     | -0.593    | 0.097     | 0.215     | 0.117     | -0.005 | -0.419            | 0.692     | 0.031     | 0.554     | 0.185     | -0.038    | 0.037  |
|                        | GA450 - Low Salt |           |           |           |           |           |        | GA450 - High Salt |           |           |           |           |           |        |
|                        | $\beta_{\max}$   | $\beta_2$ | $\beta_3$ | $\beta_4$ | $\beta_5$ | $\beta_6$ | $g_7$  | $\beta_{\max}$    | $\beta_2$ | $\beta_3$ | $\beta_4$ | $\beta_5$ | $\beta_6$ | $g_7$  |
| Eigenvalues            | 0.314            | 0.097     | 0.052     | 0.032     | 0.016     | 0.011     | 0.005  | 0.263             | 0.084     | 0.043     | 0.029     | 0.016     | 0.012     | 0.006  |
| HPD lower              | 0.174            | 0.053     | 0.03      | 0.02      | 0.011     | 0.007     | 0.003  | 0.153             | 0.048     | 0.029     | 0.018     | 0.011     | 0.007     | 0.004  |
| HPD upper              | 0.577            | 0.219     | 0.089     | 0.046     | 0.025     | 0.017     | 0.008  | 0.526             | 0.165     | 0.074     | 0.044     | 0.025     | 0.016     | 0.009  |
| Proportion             | 0.596            | 0.184     | 0.099     | 0.061     | 0.03      | 0.021     | 0.009  | 0.581             | 0.185     | 0.095     | 0.064     | 0.035     | 0.026     | 0.013  |
| <i>Trait loadings:</i> |                  |           |           |           |           |           |        |                   |           |           |           |           |           |        |
| SF                     | -0.038           | -0.144    | 0.72      | -0.14     | 0.44      | 0.493     | -0.061 | -0.453            | 0.368     | 0.166     | 0.037     | 0.782     | 0.027     | -0.134 |
| SB                     | 0.021            | -0.227    | 0.634     | 0.307     | -0.461    | -0.485    | 0.061  | -0.4              | 0.453     | -0.525    | -0.464    | -0.306    | 0.21      | 0.08   |
| FS                     | -0.005           | 0.248     | 0.036     | 0.158     | -0.572    | 0.503     | -0.576 | 0.193             | -0.164    | 0.13      | -0.2      | 0.077     | 0.858     | -0.371 |
| FB                     | 0.619            | -0.233    | -0.138    | 0.677     | 0.194     | 0.207     | 0.06   | 0.593             | 0.452     | -0.475    | 0.389     | 0.22      | 0.124     | 0.064  |
| BS                     | -0.072           | 0.201     | 0.041     | 0.043     | -0.348    | 0.416     | 0.811  | 0.069             | -0.097    | 0.142     | -0.173    | 0.21      | 0.275     | 0.903  |
| BF                     | 0.565            | -0.442    | -0.043    | -0.615    | -0.312    | 0.084     | 0.017  | 0.355             | 0.59      | 0.592     | -0.348    | -0.183    | -0.139    | -0.039 |
| Size                   | -0.539           | -0.759    | -0.236    | 0.148     | -0.102    | 0.213     | -0.009 | -0.34             | 0.267     | 0.289     | 0.663     | -0.404    | 0.33      | 0.13   |

Raw output from R is available at:

[https://github.com/ExpEvolWormLab/Mallard\\_Robertson/tree/main/output\\_files/txt/output\\_files/G\\_matrix\\_eigendecomposition/](https://github.com/ExpEvolWormLab/Mallard_Robertson/tree/main/output_files/txt/output_files/G_matrix_eigendecomposition/)
