# Supplementary material for: Selection and the direction of phenotypic evolution
Source: eLife journal article supplement (doi:10.7554/elife.80993), 2023-08-31
Supplement: fig8-data1 [file elife-80993-fig8-data1-v2.pdf]

**Figure 8A:****Null**

95% CI [0.80 - 0.91]

**Observed**

Mean 0.93  
 83% CI [0.89 - 0.97]  
 95% CI [0.91 - 0.96]

**Figure 8C:****Null**

95% CI [0.87 - 0.96]

**Observed**

Mean 0.94  
 83% CI [0.92 - 0.96]  
 95% CI [0.90 - 0.97]

**Figure 8B:****Null**

83% CI [60.0 - 90.0]  
 95% CI [45.6 - 90.0]

**Observed**

|        | gmax          | g2            | g3            |
|--------|---------------|---------------|---------------|
| Mean   | 15.4          | 85.0          | 81.6          |
| 83% CI | [11.7 - 18.6] | [81.5 - 90.0] | [75.9 - 88.3] |
| 95% CI | [10.8 - 20.3] | [78.0 - 90.0] | [74.9 - 90.0] |

**Figure 8D:****Null**

83% CI [57.2 - 90.0]  
 95% CI [43.1 - 90.0]

**Observed**

|        | gmax          | g2            | g3            |
|--------|---------------|---------------|---------------|
| Mean   | 14.7          | 86.5          | 84.4          |
| 83% CI | [11.7 - 17.3] | [83.9 - 90.0] | [80.5 - 89.9] |
| 95% CI | [11.0 - 19.3] | [81.7 - 90.0] | [78.2 - 90.0] |
