# Supplementary material for: Selection and the direction of phenotypic evolution
Source: eLife journal article supplement (doi:10.7554/elife.80993), 2023-08-31
Supplement: fig9-data1 [file elife-80993-fig9-data1-v2.pdf]

| Trait | 83% CI |       | 95% CI |       | posterior |
|-------|--------|-------|--------|-------|-----------|
|       | lower  | upper | lower  | upper | mode      |
| SF    | -1.43  | -0.29 | -1.76  | 0.05  | -0.93     |
| SB    | 0.36   | 1.43  | 0.12   | 1.79  | 0.931     |
| FS    | -0.34  | 1.09  | -0.82  | 1.42  | 0.353     |
| FB    | -0.12  | 0.73  | -0.36  | 0.93  | 0.328     |
| BS    | -2.22  | -0.11 | -2.87  | 0.46  | -0.963    |
| BF    | -1.27  | -0.36 | -1.61  | -0.1  | -0.824    |
| Size  | 0.36   | 1.4   | -0.01  | 1.67  | 0.834     |

Raw output from R is available at:

[https://github.com/ExpEvolWormLab/Mallard\\_Robertson/blob/main/output\\_files/txt/Selection\\_gradients.txt](https://github.com/ExpEvolWormLab/Mallard_Robertson/blob/main/output_files/txt/Selection_gradients.txt)
