# Supplementary material for: Selection and the direction of phenotypic evolution
Source: eLife journal article supplement (doi:10.7554/elife.80993), 2023-08-31
Supplement: fig9-data2 [file elife-80993-fig9-data2-v2.pdf]

**GA150**

| Trait | $\beta$ |       |        |       |
|-------|---------|-------|--------|-------|
|       | 83% CI  |       | 95% CI |       |
|       | lower   | upper | lower  | upper |
| SF    | -2.97   | -1.14 | -3.54  | -0.69 |
| SB    | -0.77   | 0.72  | -1.16  | 1.14  |
| FS    | -1.5    | 0.62  | -2.18  | 1.21  |
| FB    | -1.16   | 0.14  | -1.56  | 0.45  |
| BS    | -3.31   | -0.28 | -4.23  | 0.49  |
| BF    | -3.04   | -1.55 | -3.59  | -1.25 |
| Size  | -2.25   | -0.57 | -2.92  | -0.28 |

**GA250**

| Trait | $\beta$ |       |        |       |
|-------|---------|-------|--------|-------|
|       | 83% CI  |       | 95% CI |       |
|       | lower   | upper | lower  | upper |
| SF    | -2.17   | -0.54 | -2.6   | -0.06 |
| SB    | 0.99    | 2.49  | 0.67   | 2.97  |
| FS    | 2.05    | 4.2   | 1.42   | 4.7   |
| FB    | -3.01   | -1.67 | -3.35  | -1.33 |
| BS    | -4.08   | -1.09 | -5.19  | -0.46 |
| BF    | -0.21   | 1.08  | -0.63  | 1.39  |
| Size  | -0.06   | 1.44  | -0.55  | 1.78  |

**GA450**

| Trait | $\beta$ |       |        |       |
|-------|---------|-------|--------|-------|
|       | 83% CI  |       | 95% CI |       |
|       | lower   | upper | lower  | upper |
| SF    | -4.18   | -2.29 | -4.73  | -1.82 |
| SB    | 1.49    | 3.08  | 1.07   | 3.57  |
| FS    | -0.32   | 1.81  | -0.94  | 2.41  |
| FB    | -0.7    | 0.58  | -1.04  | 0.96  |
| BS    | -5.98   | -2.7  | -6.97  | -1.96 |
| BF    | -1.64   | -0.28 | -2.06  | 0.1   |
| Size  | -1.93   | -0.32 | -2.59  | -0.01 |

Raw output from R is available at:

[https://github.com/ExpEvolWormLab/Mallard\\_Robertson/blob/main/output\\_files/txt/Selection\\_gradients.txt](https://github.com/ExpEvolWormLab/Mallard_Robertson/blob/main/output_files/txt/Selection_gradients.txt)
