# Supplementary material for: Selection and the direction of phenotypic evolution
Source: eLife journal article supplement (doi:10.7554/elife.80993), 2023-08-31
Supplement: table3-data5 [file elife-80993-table3-data5-v2.pdf]

MA lines- Low Salt

|                        | $m_{\max}$ | $m_2$ | $m_3$ | $m_4$ | $m_5$ | $m_6$ | $m_7$ |
|------------------------|------------|-------|-------|-------|-------|-------|-------|
| Eigenvalues            | 0.31       | 0.29  | 0.06  | 0.05  | 0.04  | 0.02  | 0.009 |
| Proportion             | 0.39       | 0.37  | 0.08  | 0.06  | 0.05  | 0.03  | 0.01  |
| <i>Trait loadings:</i> |            |       |       |       |       |       |       |
| SF                     | -0.4       | -0.13 | -0.58 | 0.22  | -0.09 | 0.47  | 0.45  |
| SB                     | -0.22      | -0.21 | -0.42 | 0.39  | -0.23 | -0.46 | -0.56 |
| FS                     | 0.61       | 0.26  | -0.28 | 0.37  | 0.25  | 0.43  | -0.32 |
| FB                     | 0.63       | -0.52 | -0.24 | -0.17 | -0.36 | -0.17 | 0.29  |
| BS                     | 0.08       | 0.11  | -0.29 | 0.09  | 0.67  | -0.54 | 0.37  |
| BF                     | -0.1       | -0.76 | 0.18  | 0.01  | 0.52  | 0.24  | -0.21 |
| Size                   | 0.07       | -0.1  | 0.48  | 0.79  | -0.14 | -0.08 | 0.32  |

Raw output from R is available at:

[https://github.com/ExpEvolWormLab/Mallard\\_Robertson/blob/main/output\\_files/txt/MAlines\\_eigenvectors.txt](https://github.com/ExpEvolWormLab/Mallard_Robertson/blob/main/output_files/txt/MAlines_eigenvectors.txt)
