# Supplementary figures and images for: Selection and the direction of phenotypic evolution
Source: eLife journal article supplement (doi:10.7554/elife.80993), 2023-08-31

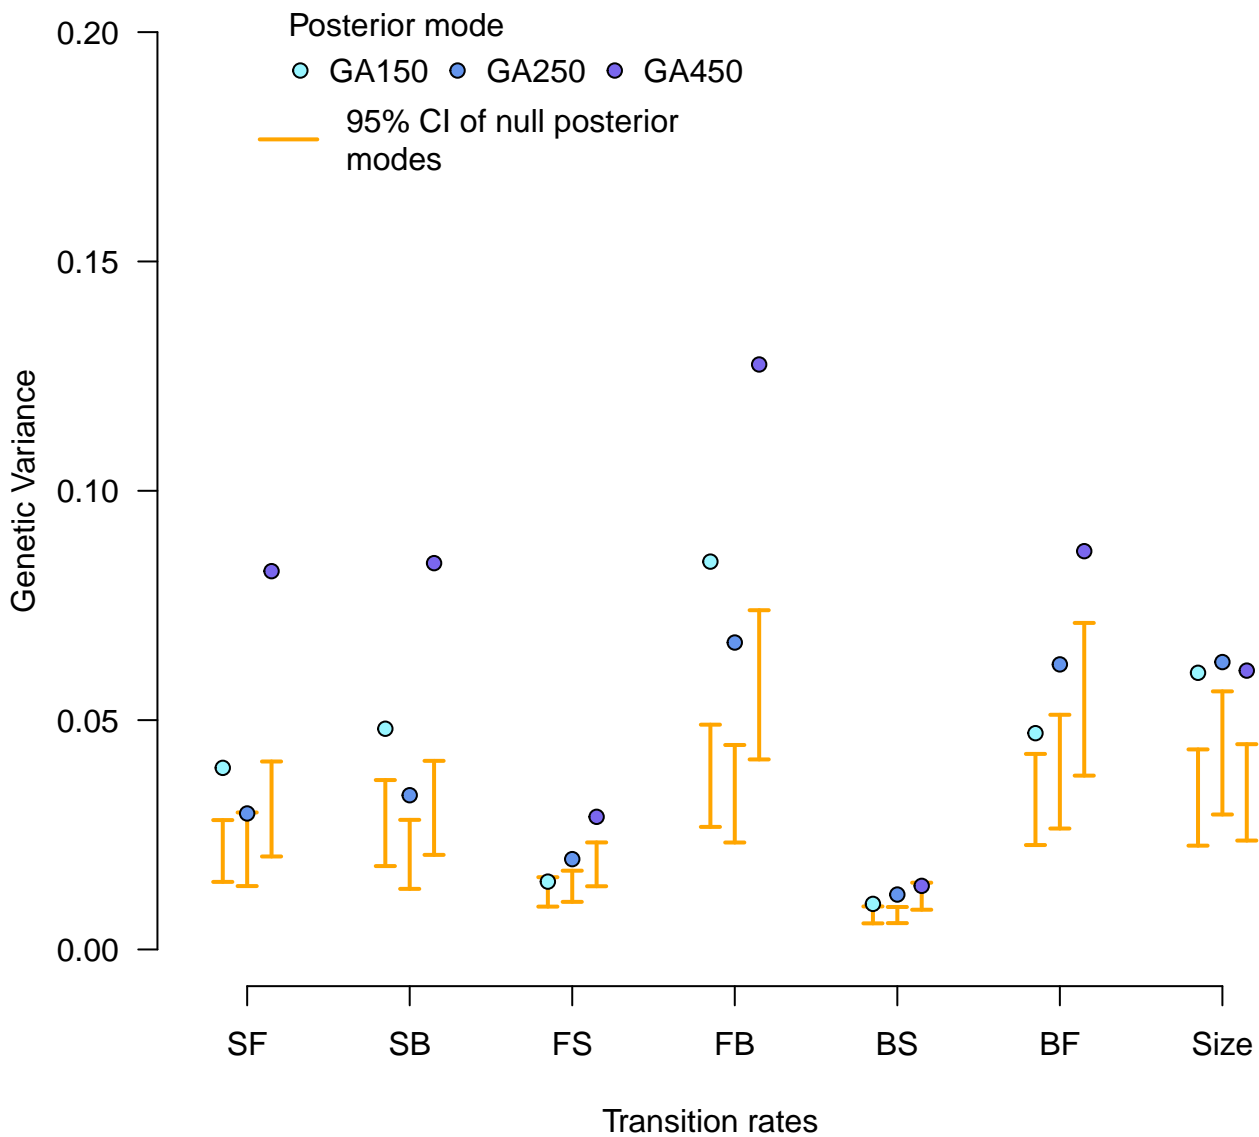

Supplement: supp [file elife-80993-supp-v1.zip]

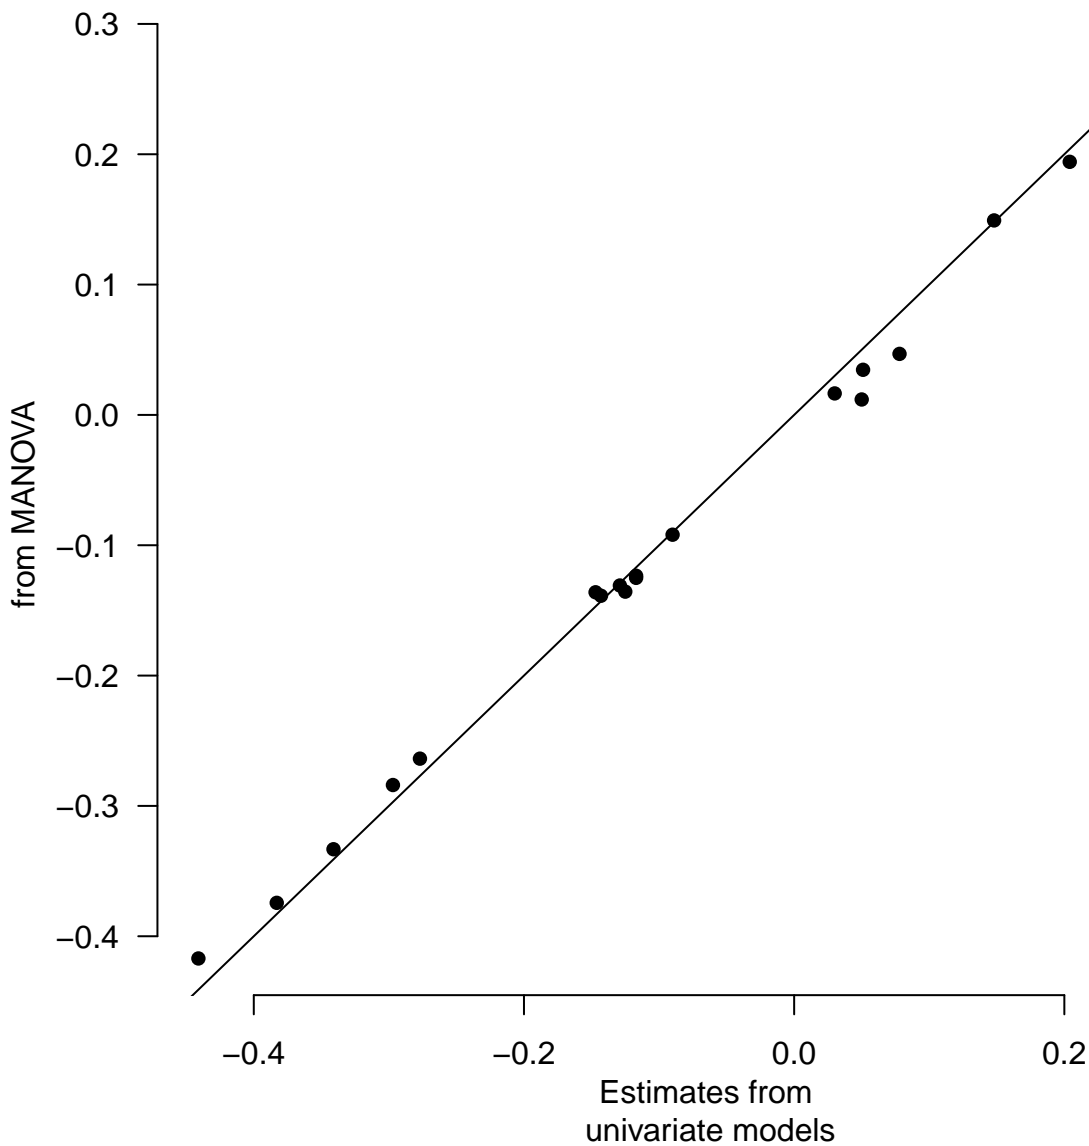

Supplement: supp [file elife-80993-supp-v1.zip]

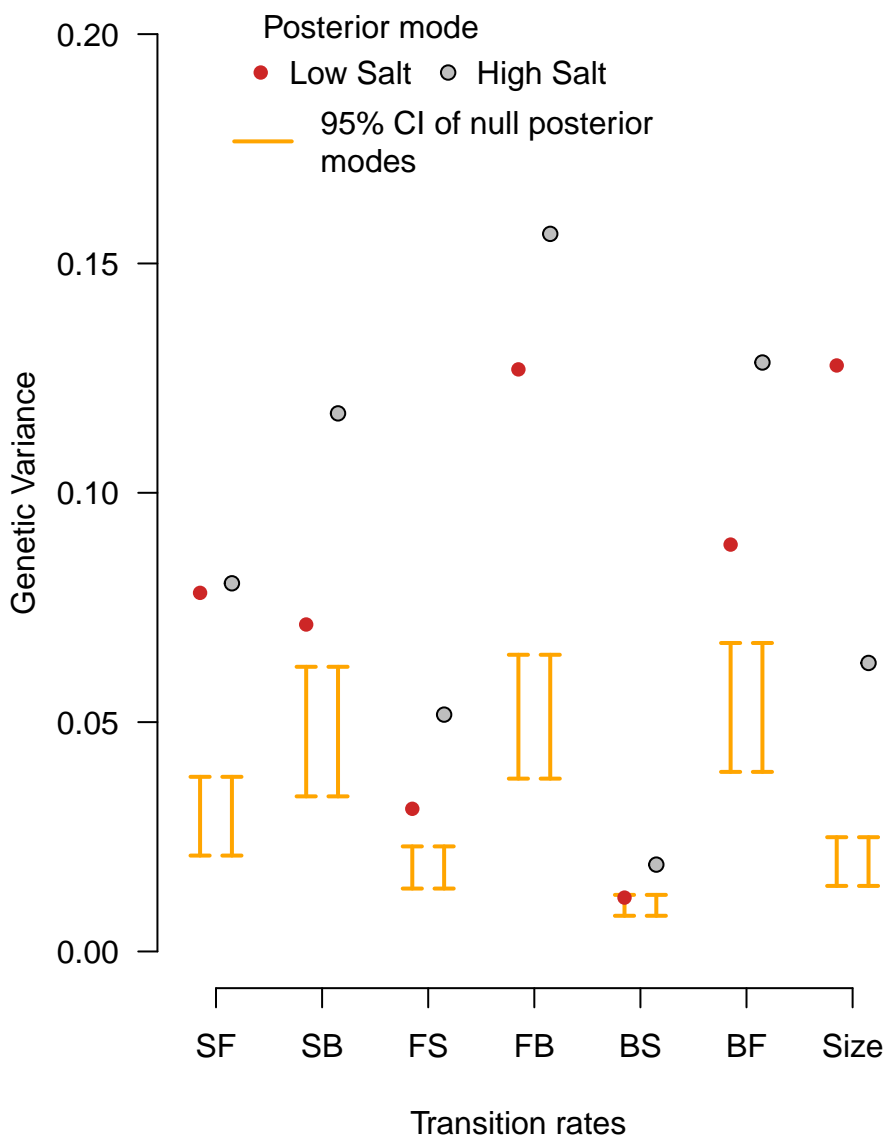

Supplement: supp [file elife-80993-supp-v1.zip]

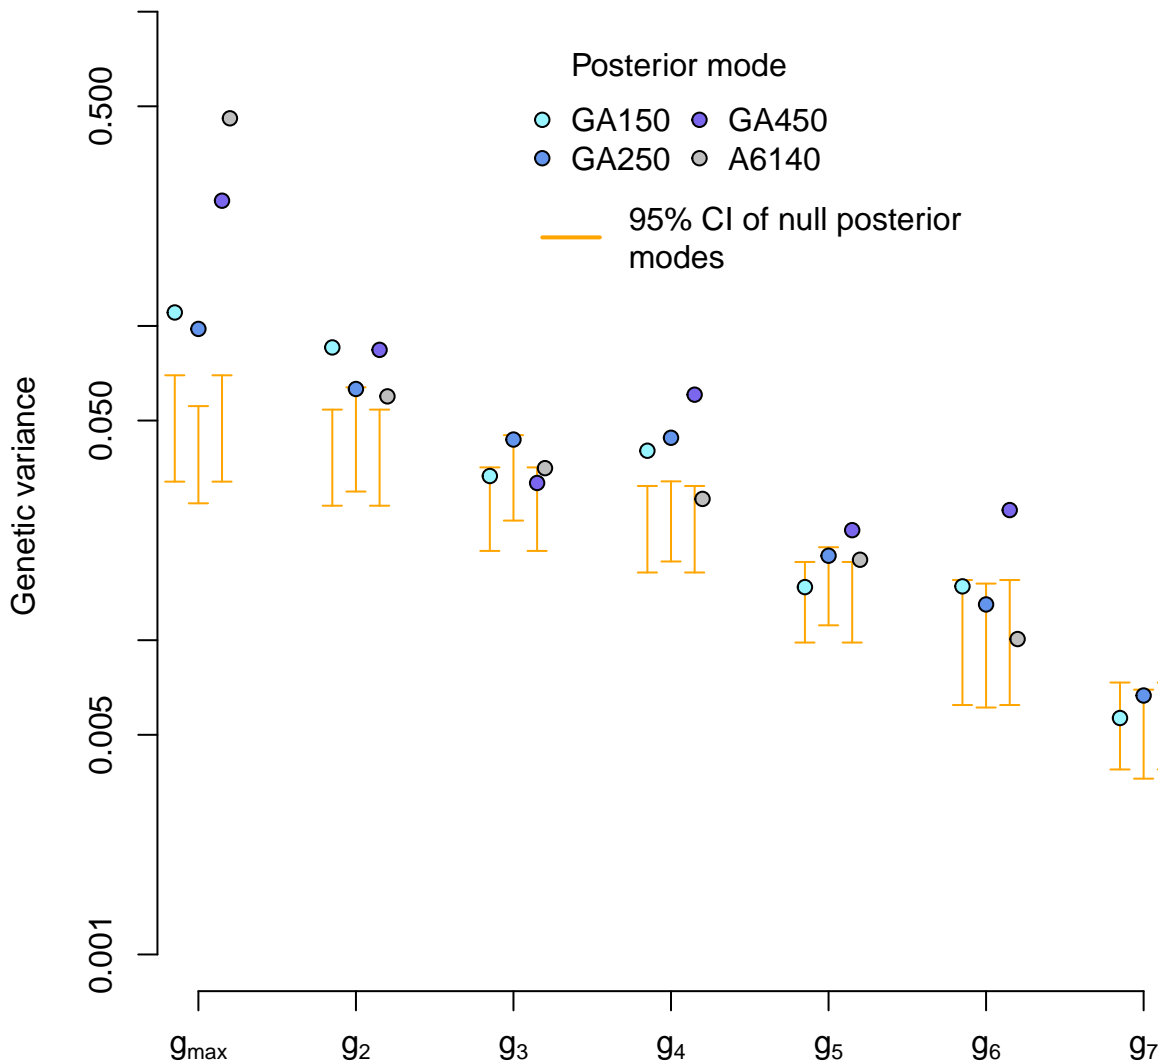

Supplement: supp [file elife-80993-supp-v1.zip]

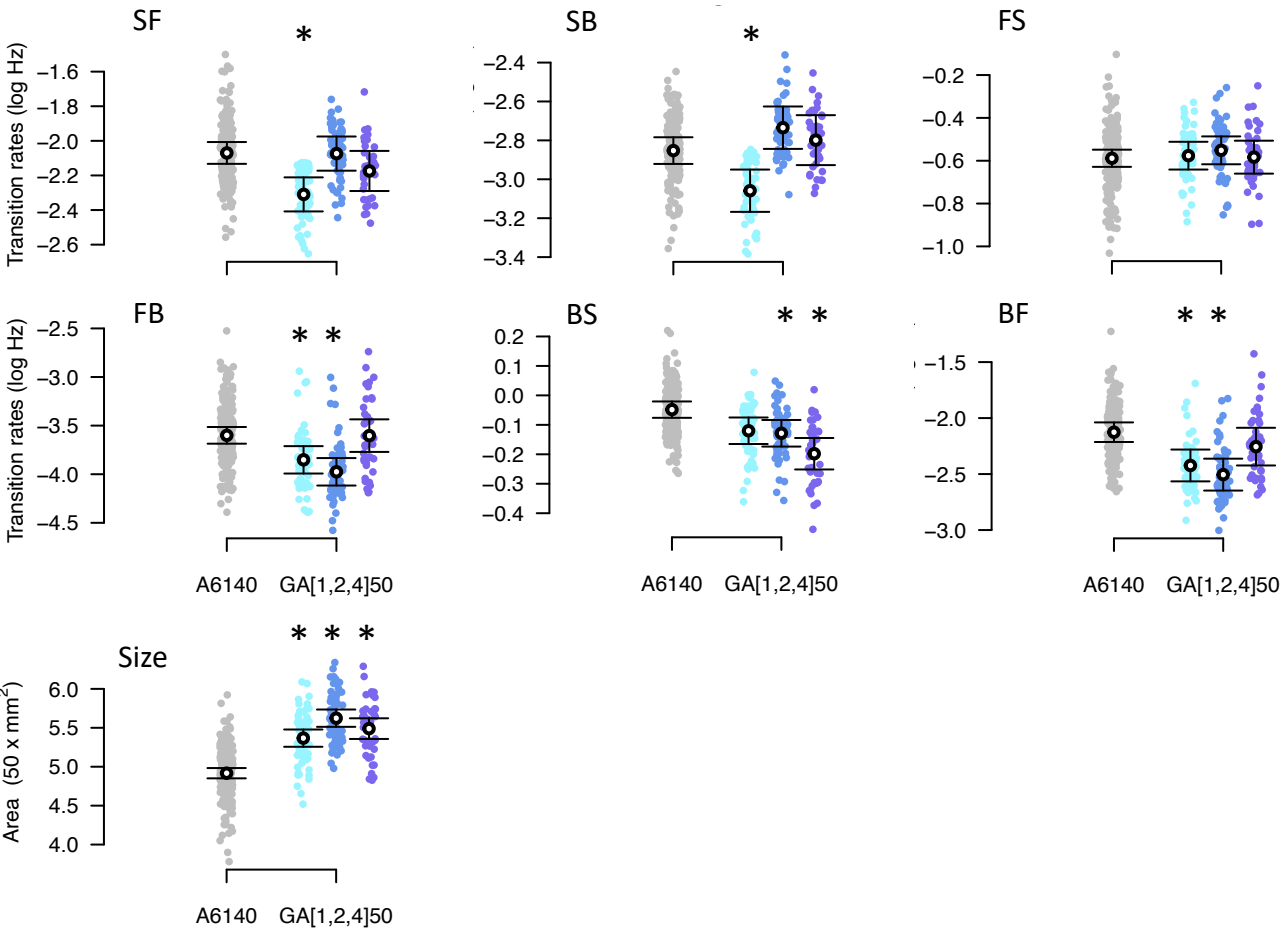

Supplement: supp [file elife-80993-supp-v1.zip]

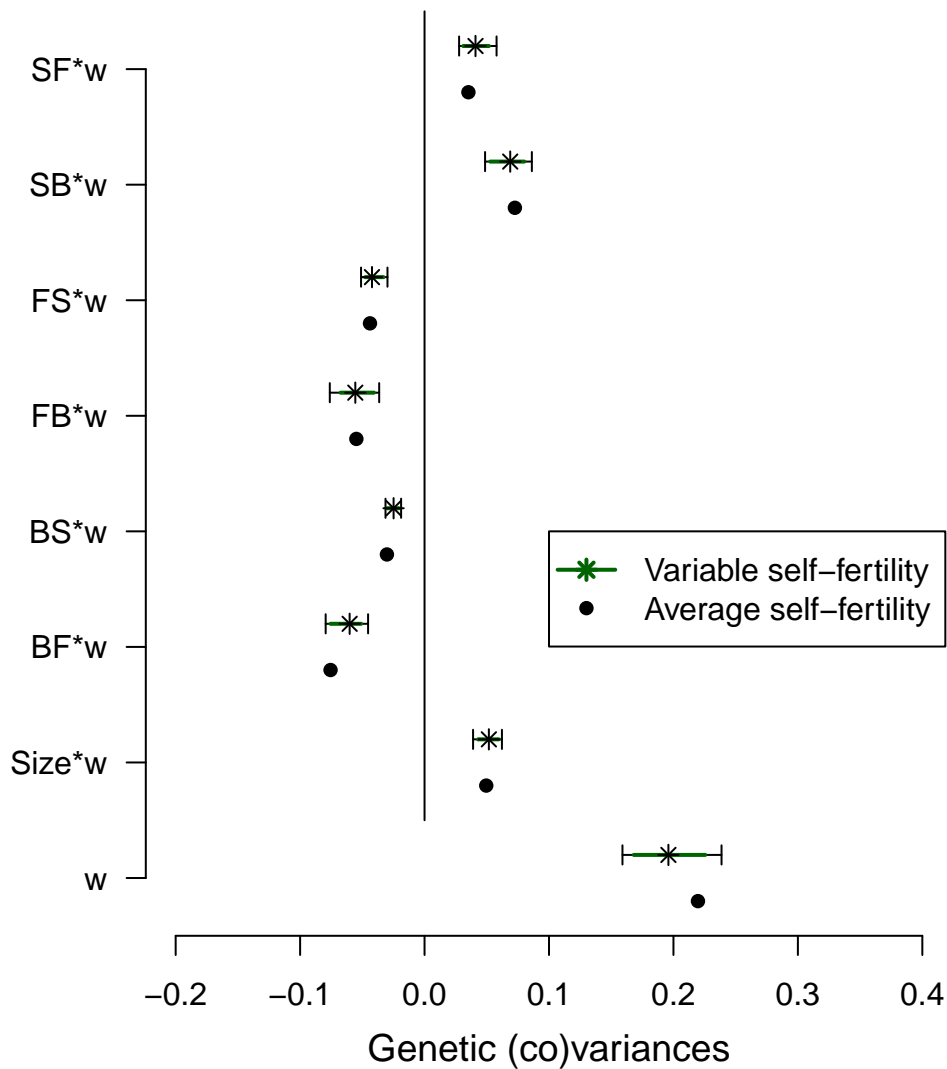

Supplement: supp [file elife-80993-supp-v1.zip]

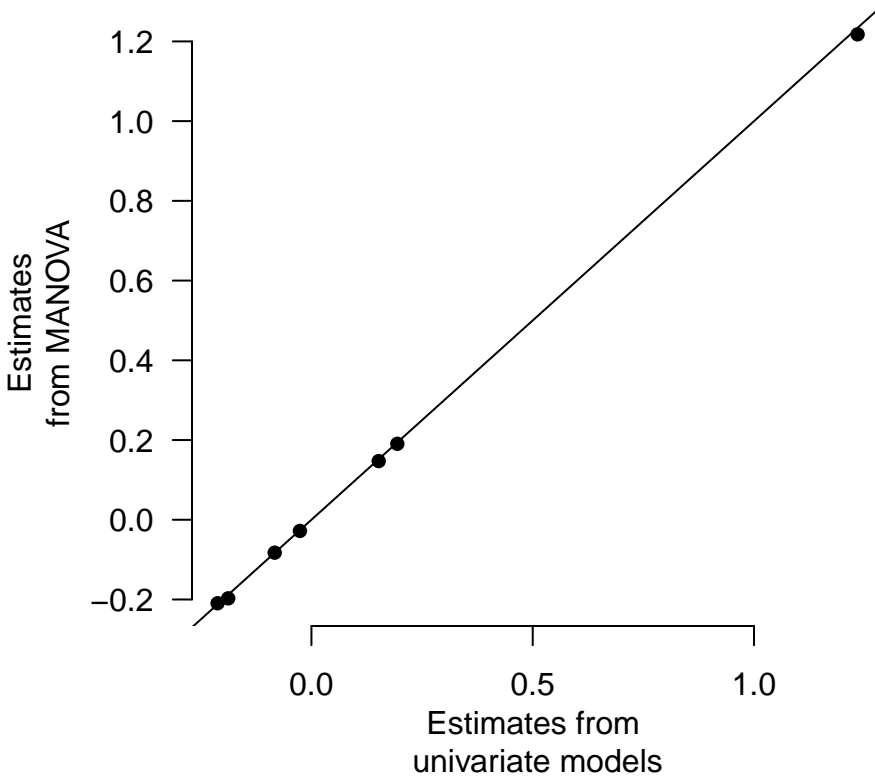

Supplement: supp [file elife-80993-supp-v1.zip]

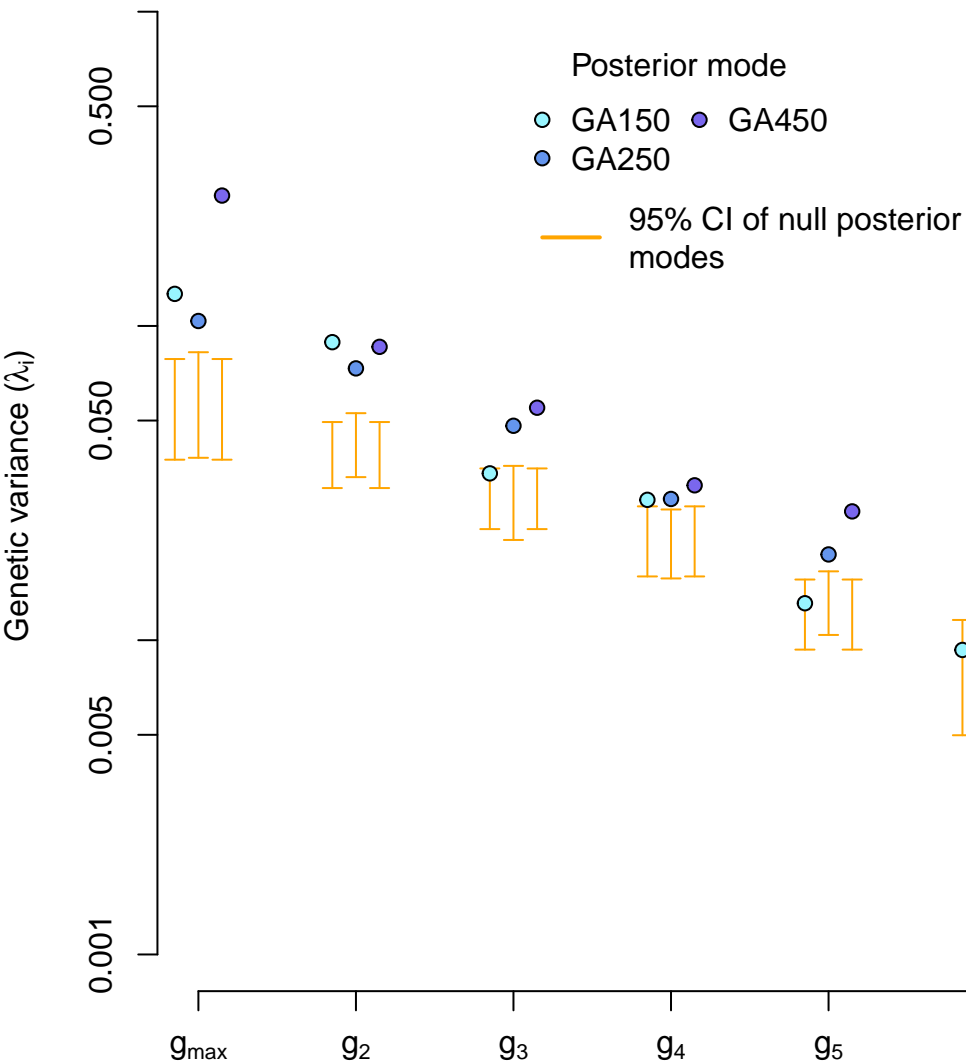

Supplement: supp [file elife-80993-supp-v1.zip]

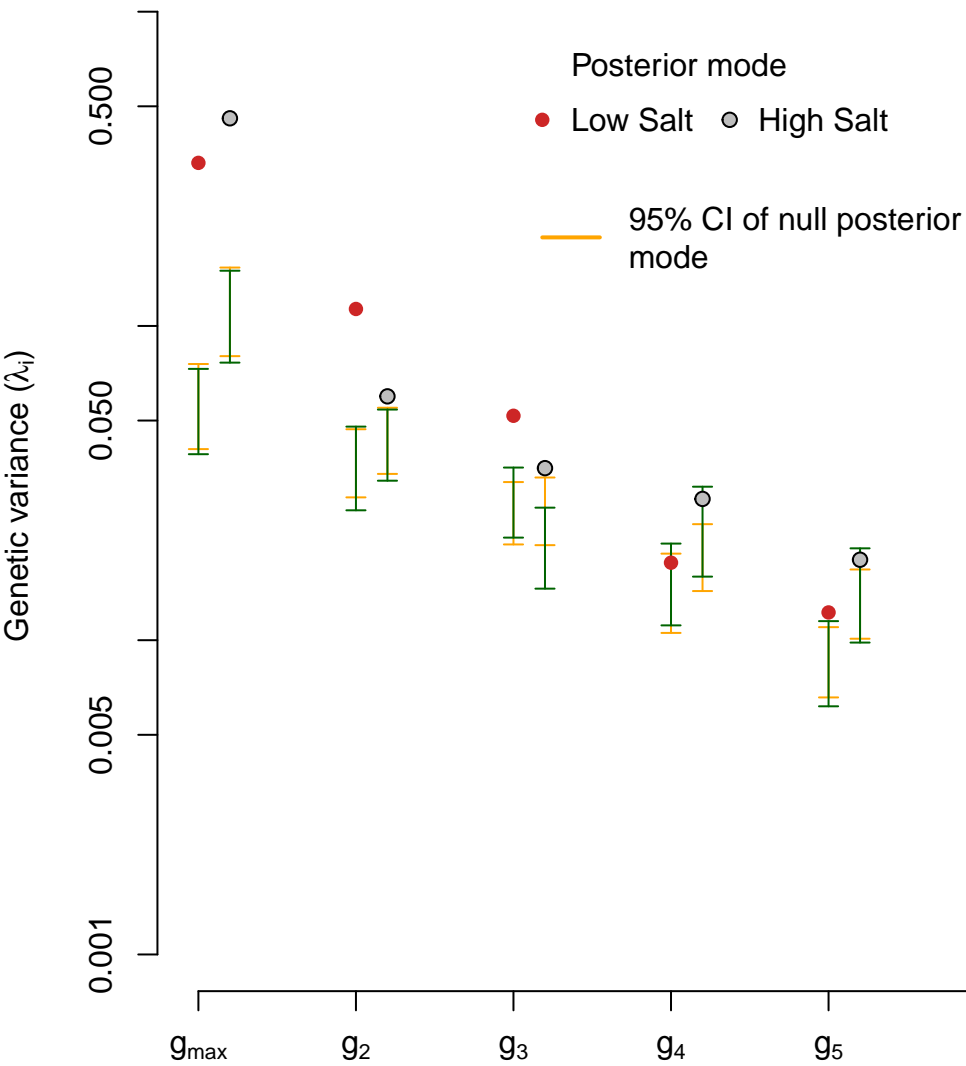

Supplement: supp [file elife-80993-supp-v1.zip]

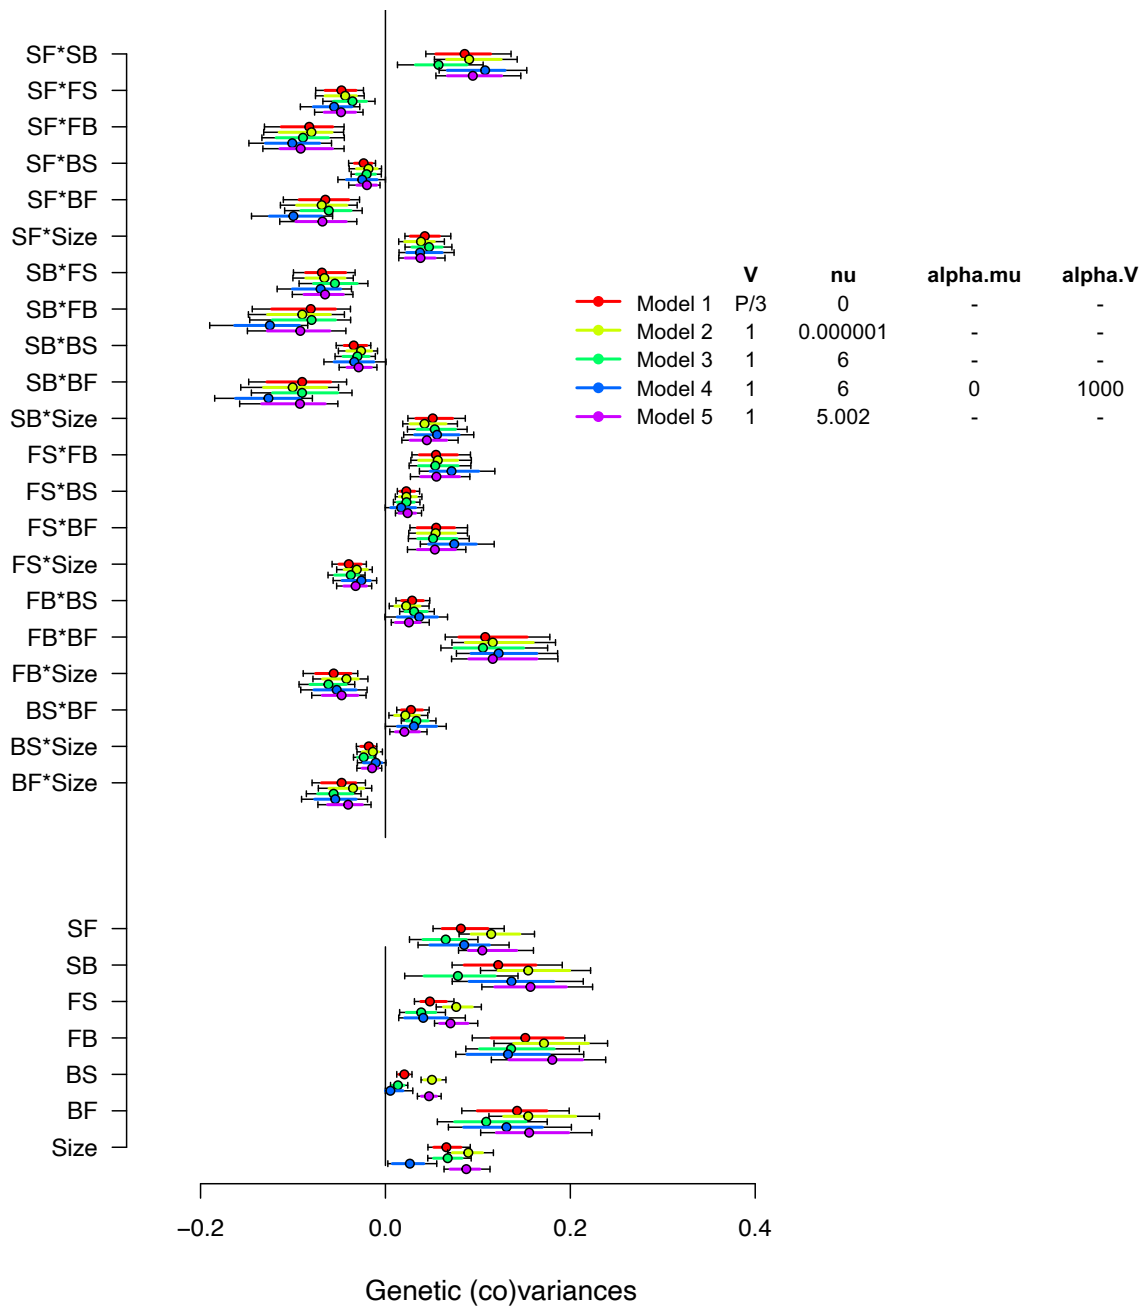

Supplement: supp [file elife-80993-supp-v1.zip]

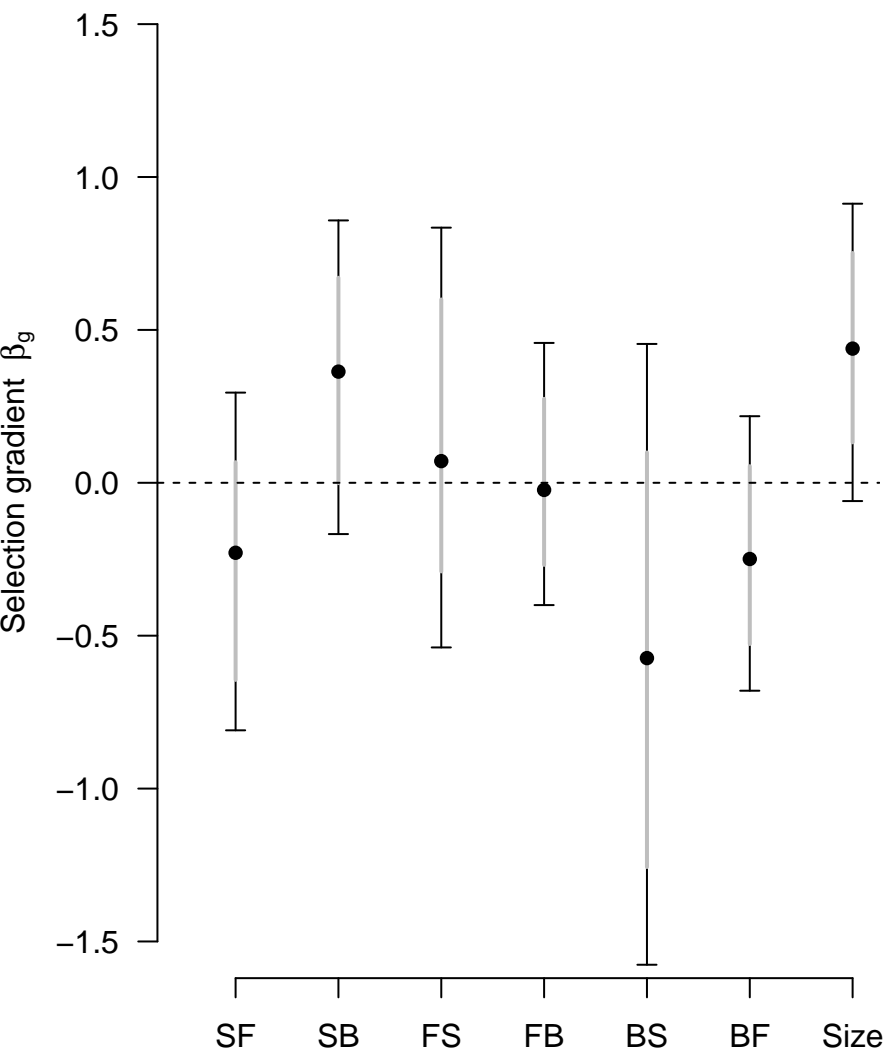

Supplement: supp [file elife-80993-supp-v1.zip]

Selection gradients

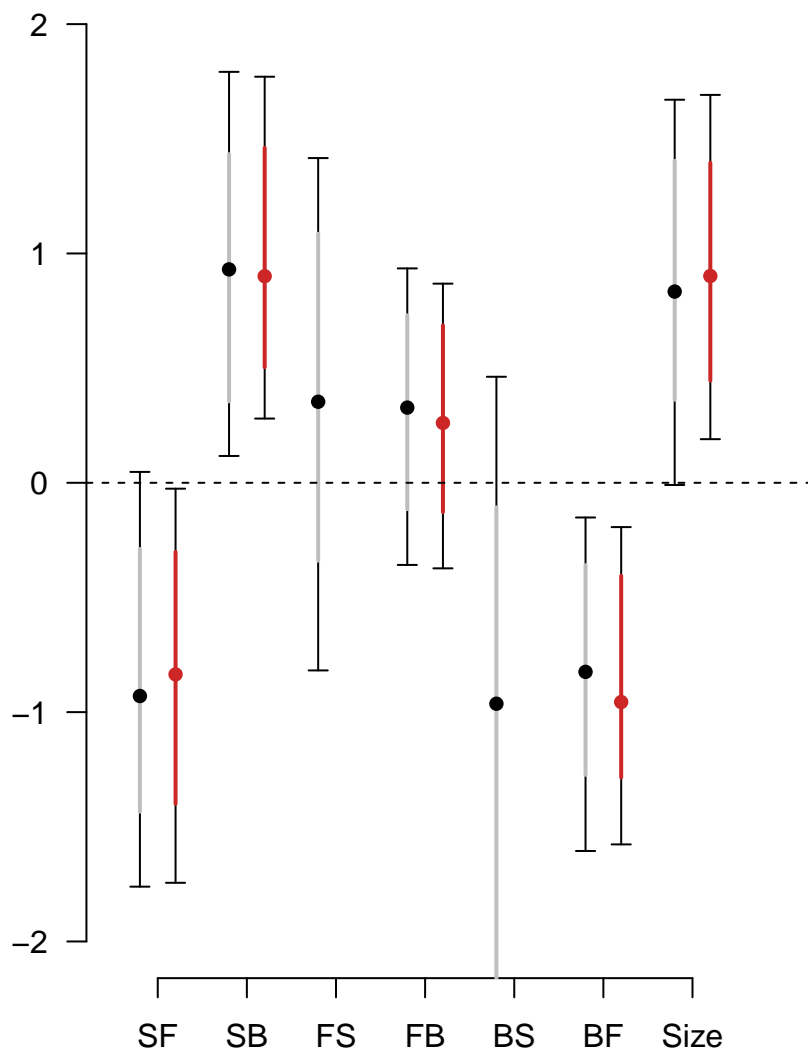

Supplement: supp [file elife-80993-supp-v1.zip]

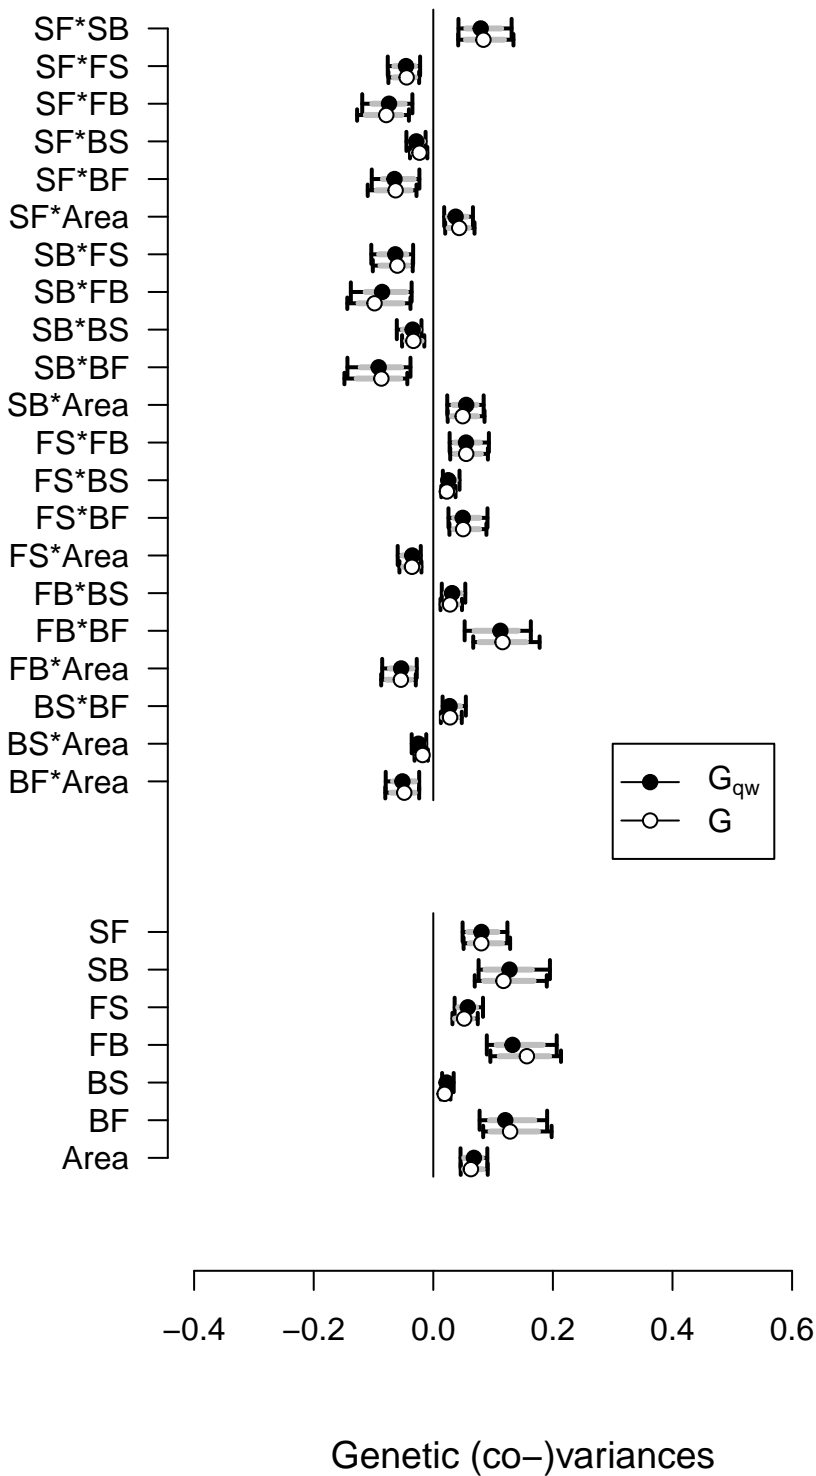

Supplement: supp [file elife-80993-supp-v1.zip]
